# Supplementary material
Source: PubMed Central journal article supplement (PMC5373386)
Supplement: pnas.1615575114.sapp.pdf [file pnas.1615575114.sapp.pdf]

## Supporting Information (SI)

### **Polyphosphate granule biogenesis is temporally and functionally tied to cell cycle exit during starvation in *Pseudomonas aeruginosa***

Lisa R. Racki, Elitza I. Tocheva, Michael G. Dieterle, Meaghan C Sullivan, Grant J. Jensen, Dianne K. Newman

#### **Supporting Information Appendix**

**SI Methods** (pages 2-4)

**Figure S1.** Elemental analysis of putative polyphosphate granules by Energy Dispersive X-ray Spectroscopy (EDS). (page 5)

**Figure S2.** TEM images of polyphosphate mutants under nitrogen starvation. (page 6)

**Figure S3.** Control for specificity of GFP-ParB<sup>DMT1</sup>-ParS<sup>DMT1</sup> interaction. (page 7)

**Figure S4.** Changes in granule number and size. (page 8)

**Figure S5.** Granule spacing on long axis of the cell. (page 9)

**Figure S6.** Simulation of polyP granule positioning on long axis of the cell. (page 10)

**Figure S7.** Granule spatial organization imaged by DAPI fluorescence. (page 11)

**Figure S8.** Effects of individual polyphosphate kinases on cell cycle exit. (page 12)

**Table S1:** Strains (pages 13-17)

**Table S2:** Plasmids (pages 18-20)

**Table S3:** Primers (pages 21-23)

**SI Matlab Script:** peas2pod\_simulation.m (pages 24-27)

**SI References** (page 28)

## SI METHODS

### Strain construction

Strains, plasmids, and primers used in this study are listed in Tables S1-3 respectively.

### Plasmids

All plasmids were generated using Gibson cloning (1). Plasmids pLREX9, pLREX21, pLREX23, pLREX24, pLREX25, pLREX27, pLREX35, and pLREX36 are derivatives of suicide vector pMQ30 (2), generated by amplifying 1 kb of sequence upstream and downstream of the target gene from *P. aeruginosa* genomic DNA. For pLREX24, 1kb of sequence upstream of *phaC1* and 1 kb of sequence downstream of *phaC2* were used, resulting in deletion of three intervening genes: *phaC1*, *phaD* and *phaC2*. For pLREX27, the last 13 bases of *ppk1* were retained because of overlap with the c-terminus of the coding region of the exopolyphosphatase *ppx*, transcribed from the opposite strand. Plasmid pLREX15 is a derivative of pMQ72 (2), generated by amplifying the coding sequence for *ppk2B* (PA14\_33240) from *P. aeruginosa* genomic DNA using primers that insert a 6His tag, followed by the T<sub>ev</sub> cleavage site on the 5' terminus of the protein. Plasmids pLREX60 and pLREX61 are derivatives of pMQ70 (2), generated by amplifying the coding sequence for *ppk2A* (PA14\_01730) from *P. aeruginosa* genomic DNA using primers that insert a Flag tag, followed by a linker containing an 8 amino acid serine/glycine linker, on the 5' terminus of the protein. Plasmids pLREX38, pLREX49, pLREX62, pLREX63, pLREX64, pLREX65, and pLREX66 are derivatives of pUC18R6K- mini-Tn7T-Gm (3). pLREX38 was generated by amplifying the *ssb* coding sequence and 1kb upstream sequence from *P. aeruginosa* genomic DNA. pLREX49 was generated by amplifying the *ParS*<sup>pMTI</sup> sequence from pFHC3228 (4), the upstream sequence containing the *ssb* promoter from *P. aeruginosa* genomic DNA, and the GFP-*parB*<sup>pMTI</sup> chimera from pFHC2973 (4). pLREX62 was generated by amplifying the *ParS*<sup>pMTI</sup> sequence from pFHC3228 (4), the *ssb* coding sequence and 1kb upstream sequence from *P. aeruginosa* genomic DNA, and the GFP-*parB*<sup>pMTI</sup> chimera from pFHC2973 (4). pLREX63 was generated by amplifying the *ssb* coding sequence and 1kb upstream sequence from *P. aeruginosa* genomic DNA, and the GFP-*parB*<sup>pMTI</sup> chimera from pFHC2973 (4). pLREX64 was generated by amplifying a fragment containing *araC*, and P<sub>ara</sub> *Flag-ppk2A* (PA14\_01730) followed by the T1T2 transcriptional terminator from pLREX60, and a fragment containing *ParS*<sup>pMTI</sup> P<sub>ssb</sub> *ssb*-mCherry GFP-*parB*<sup>pMTI</sup> from pLREX62. pLREX65 was generated by amplifying a fragment containing *araC*, and P<sub>ara</sub> *Flag-ppk2A*<sup>D183A,R184A</sup> (PA14\_01730) followed by the T1T2 transcriptional terminator from pLREX61, and a fragment containing *ParS*<sup>pMTI</sup> P<sub>ssb</sub> *ssb* - mCherry GFP-*parB*<sup>pMTI</sup> from pLREX62. pLREX66 was generated by amplifying a fragment containing *araC*, and P<sub>ara</sub> *His-Tev-ppk2B* (PA14\_33240) followed by the T1T2 transcriptional terminator from pLREX15, and a fragment containing *ParS*<sup>pMTI</sup> P<sub>ssb</sub> *ssb*-mCherry GFP-*parB*<sup>pMTI</sup> from pLREX62.

### Strains

All unmarked deletion strains, and strains in which the endogenous *ppk2A* is replaced by a *ppk2A*-mCherry chimera, were generated by triparental conjugation with *P. aeruginosa* UCBPP-PA14, and then merodiploids were selected as described by Choi and Schweizer (3) on VBMM medium (3 g/L trisodium citrate, 2 g/L citric acid, 10g/L K<sub>2</sub>HO<sub>4</sub>, 3.5 g/L

NaNH<sub>4</sub>PO<sub>4</sub>, 1mM MgSO<sub>4</sub>, 100uM CaCl<sub>2</sub>, pH 7) containing 100 ug/mL gentamicin. Counterselection for homologous recombination events removing the endogenous copy of the gene in question was then performed on LB plates without NaCl and containing 20mM sucrose, followed by PCR. All strains with insertions at the *attTn7* site were generated by tetraparental conjugation with *P. aeruginosa* UCBPP-PA14, and then exconjugants were selected as described by Choi and Schweizer (3) on VBMM medium, and verified by PCR.

### Media and Growth conditions

For nitrogen starvation experiments, strains were grown at 37°C shaking in MOPS-buffered minimal media overnight (40mM sodium succinate, 22mM NH<sub>4</sub>Cl, 43mM NaCl, 2.2mM KCl, 1.25mM NaH<sub>2</sub>P<sub>04</sub>, 1mM MgSO<sub>4</sub>, 0.1mM CaCl<sub>2</sub>, 7.5μM FeCl<sub>2</sub>·4H<sub>2</sub>O, 0.8μM CoCl<sub>2</sub>·6H<sub>2</sub>O, 0.5μM MnCl<sub>2</sub>·4H<sub>2</sub>O, 0.5μM ZnCl<sub>2</sub>, 0.2μM Na<sub>2</sub>MoO<sub>4</sub>·2H<sub>2</sub>O, 0.1μM NiCl<sub>2</sub>·6H<sub>2</sub>O, 0.1μM H<sub>3</sub>BO<sub>3</sub>, and 0.01μM CuCl<sub>2</sub>·2H<sub>2</sub>O, 50mM MOPS, pH 7.2). 10-25mL cultures at OD<sub>500</sub> = 0.0125 to 0.025 were grown in 250mL Erlenmeyer flasks at 37°C shaking to OD<sub>500</sub> = 0.4 to 0.6, then spun down at room temperature in 50mL conical tubes at 5000xG, and resuspended to OD<sub>500</sub> = 0.4 in nitrogen-limited MOPS-buffered minimal media (Identical to MOPS-buffered media, but with 1mM NH<sub>4</sub>Cl instead of 22mM) in clean Erlenmeyer flasks and grown at 37°C shaking. Time 0h = cells collected immediately before being spun down and shifted to nitrogen-limited medium.

### RNA Extraction

Total RNA was extracted from ~10<sup>9</sup> cells using the RNeasy Mini Kit (Qiagen), including the optional on-column DNase treatment step. 5-10 μg per sample were subsequently treated with Turbo DNase Free (Ambion) according to the manufacturer's instructions. Absorbance at 260 nm was used to quantify purified RNA, and qPCR of the purified RNA was used to verify thorough removal of free of genomic DNA.

### qRT-PCR

The iScript cDNA synthesis kit (BioRad) was used to convert 1 μg DNase-treated total RNA to cDNA. 1/100<sup>th</sup> of the reaction mix (representing 10 ng of total RNA) was subsequently used as template for each qRT-PCR reaction using the iTaq SYBR Green reaction mix (BioRad) and 500 nM each of forward and reverse primers. Samples were run using a 40 cycle program with an annealing temperature of 60°C on a Real Time 7500 PCR Machine (Applied Biosystems). Samples were assayed in biological triplicate. Threshold cycle values of *OprI* were used as an endogenous control. Expression values are reported relative to the expression value of the same gene in exponential growth phase (0h). Primers were designed using Primer3 and are listed in Table S3.

### Granule statistics (TEM)

For Figure 3, global analysis of granule volume and count are shown, combining all cells from multiple independent experiments for a given timepoint (n = 4 experiments for 1h, n = 3 for 1.5h, n = 2 for 2h, n = 4 for 3h, n = 3 for 6h, n = 2 for 24h). Average of means from individual data sets: Granules/cell: 11.7±2.5 at 1h; 7.1±1.8 at 1.5h, 5.4±0.3 at 2h, 3.7±1.9 at 3h, 5.6±1.7 at 6h, 6.7±0.9 at 24h. Granule volume: 0.0020±.0001μm<sup>3</sup> at 1h, 0.0048±.0015 μm<sup>3</sup> at 1.5h, 0.0096±.0057 μm<sup>3</sup> at 2h, 0.0129±.0049 μm<sup>3</sup> at 3h, 0.0137±0.0013 μm<sup>3</sup> at 6h, 0.0081±.0006 μm<sup>3</sup> at 24h.

### **Simulation of Granule Positioning**

Model for the simulation (See Fig S6a):  $mEnd$  = user-defined constraint on the minimum distance (in microns) from cell ends. For the first granule,  $lowerBound1$  and  $upperBound1$  are defined by the sum of the radius of granule 1 ( $r1$ ) and a user-defined minimum distance for granules from cell ends ( $mEnd$ ). The allowed region for the origin of granule 1: between  $lowerBound1$  and ( $cell\ Length - upperBound1$ ). For the second granule,  $lowerBound2$  and  $upperBound2$  defined by the sum of the radius of granule 2 ( $r2$ ) and the user-defined minimum distance for granules from cell ends. A user-defined minimum distance between granules ( $mGran$ ) constrains the origins of granules 1 and 2 to be at least  $r1 + mGran + r2$  apart.

To determine the best  $mEnd$  and  $mGran$  parameters, we analyzed all combinations of  $mEnd$  and  $mGran$  from 0 to 0.6  $\mu m$  in 0.1  $\mu m$  increments, see heat map in Figure 4b, as well as Figure S6. For each combination of parameters, we modeled 229,000 cells. We then used the non-parametric Kolmogorov-Smirnov (KS) test to compare the experimentally observed distribution to the modeled distributions. For the KS testing, we combined the positions of both granules into a single bi-modal distribution. A heat map of the resulting KS test statistics, and the resulting p-values are consistent, indicating that a minimum distance from cell ends of 0.3  $\mu m$  and between granules of 0.2  $\mu m$  gives the best fit.

Simulation procedure: The matlab script 'peas2pod\_simulation.m', included at the end of the supplement, takes the following input values:  $cells$  = number of cells to simulate;  $muLength$  = mean cell Length ( $\mu m$ ),  $sigmaLength$  = standard deviation of distribution of cell lengths ( $\mu m$ ),  $muDiameter$  = mean diameter of granules ( $\mu m$ ),  $sigmaDiameter$  = standard deviation of distribution granule diameters ( $\mu m$ ),  $mEnd$  = minimum distance of edge of granule from cell end ( $\mu m$ ),  $mGran$  = minimum distance from edge of granule1 to edge of granule2 ( $\mu m$ ).

This function generates a population of a specified number of cells with a normal distribution of cell lengths specified by input mean and standard deviation values, and also generates two populations of granules, each with a normal distribution of granule diameters using mean and standard deviation values from the EM data. Each cell is screened to make sure that both granules can fit into the cell length given the constraints of minimum distance from ends and between granules; if both granules do not fit, then the function randomly re-generates a new length and new granule diameters using the input mean and standard deviation values for cell length and granule diameter. For each cell, the function positions granule 1 randomly, but excluding it from the cell ends by input  $mEnd + radius\ of\ granule\ 1$ . The function then does the same for granule 2. The function then checks that the position of granule 2 satisfies the following condition: it must be at least  $radius\ granule1 + mGran + radius\ granule2$  away from granule 1. If it doesn't satisfy this condition, the function randomly re-positions one of the granules within the cell (which granule is determined by a coin toss) and again checks that this new pair of granules satisfies both  $mEnd$  and  $mGran$ . The function repeats this process until the  $mEnd$  and  $mGran$  constraints are satisfied, and then goes on to the next cell.

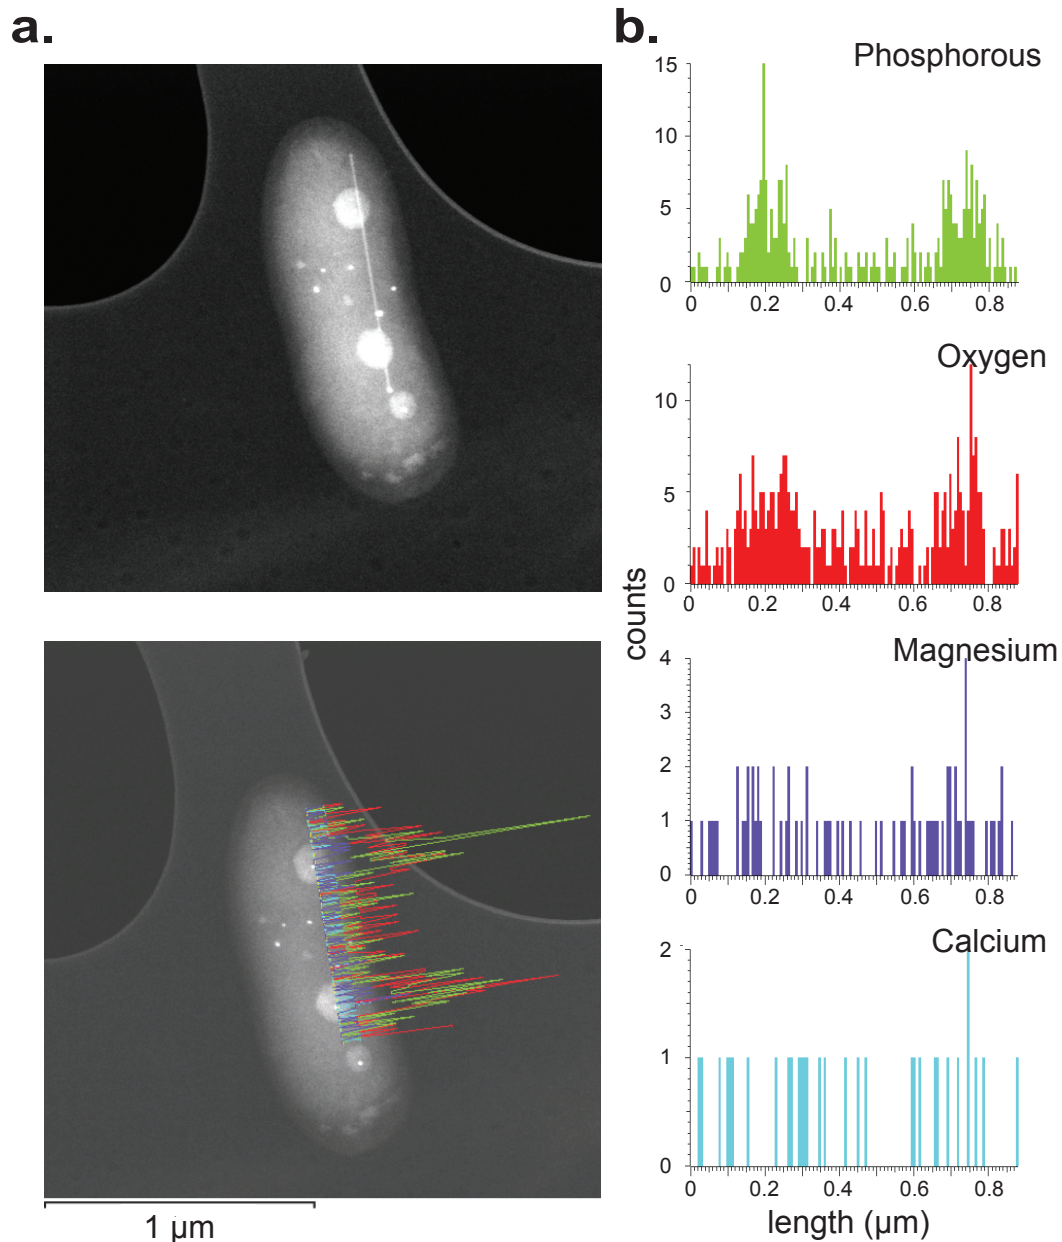

**Figure S1. Elemental analysis of putative polyphosphate granules by Energy Dispersive X-ray Spectroscopy (EDS).** A) Top Panel: Scanning emission EM image of cell after line analysis. Bottom Panel: Overlay of line analysis for phosphorous (green), oxygen (red), magnesium (blue), and calcium (cyan). B) Line analysis transecting two polyphosphate granules shows elevated counts of phosphorous and oxygen relative to cell background.

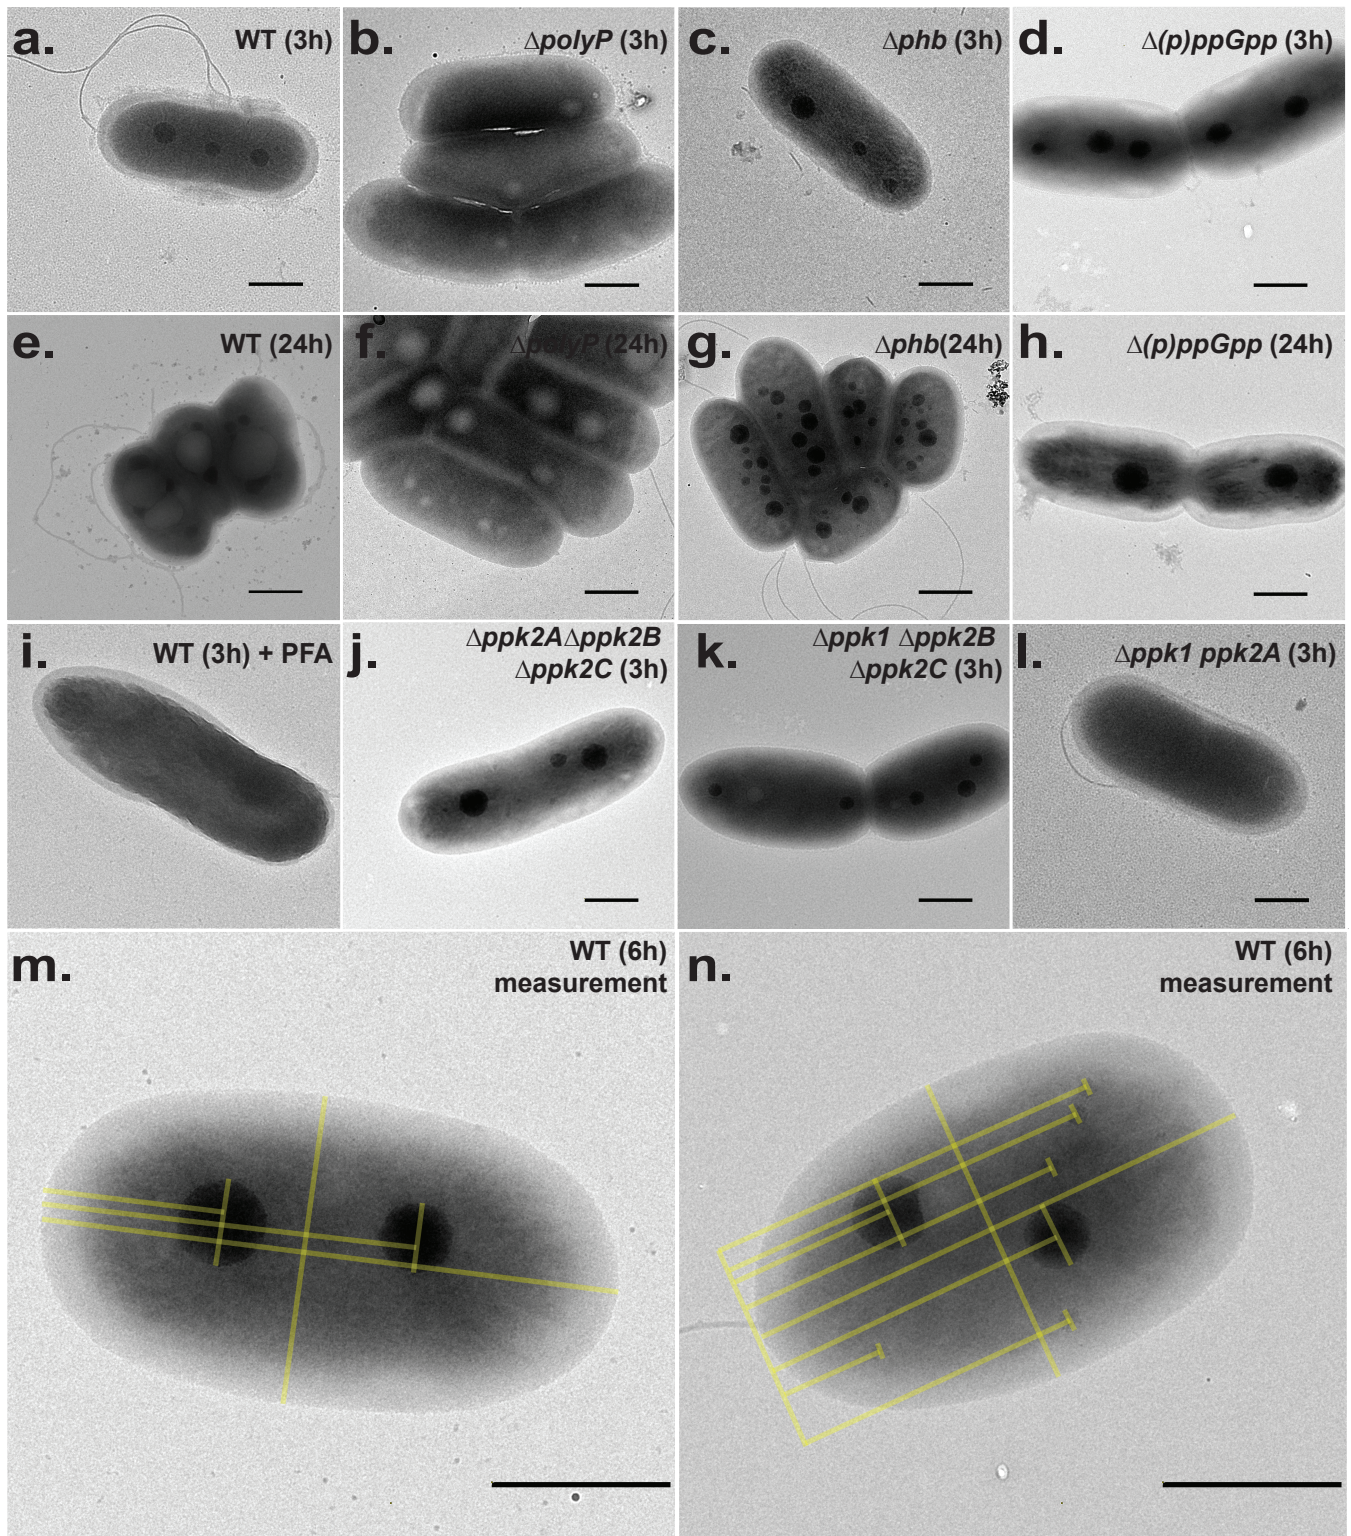

**Figure S2. TEM images of polyphosphate mutants under nitrogen starvation.** Scale bar = 0.5  $\mu\text{m}$  A) 3h WT cell, B) 3h  $\Delta\text{polyP}$  cells ( $\Delta\text{ppk1}\Delta\text{ppk2A}\Delta\text{ppk2B}\Delta\text{ppk2C}$ ), C) 3h  $\Delta\text{phb}$  cell lacking both polyhydroxyalkanoate synthases,  $\Delta(\text{phaC1-phaC2})$ . D) 3h  $\Delta(\text{p})\text{ppGpp}$  cell lacking both (p)ppGpp synthases,  $\Delta\text{relA}\Delta\text{spoT}$ . E) 24h WT cells. F) 24h,  $\Delta\text{polyP}$  cells. G) 24h,  $\Delta\text{phb}$  cells. H) 24h,  $\Delta(\text{p})\text{ppGpp}$  cell. I) 3h WT cell fixed with paraformaldehyde before drying on EM grid. J) 3h triple mutant cell  $\Delta\text{ppk2A}\Delta\text{ppk2B}\Delta\text{ppk2C}$ . K) 3h triple mutant cell  $\Delta\text{ppk1}\Delta\text{ppk2B}\Delta\text{ppk2C}$ . L) 3h  $\Delta\text{ppk1}\Delta\text{ppk2A}$  double mutant cell. M) 6h WT cell showing measurement of cell and granule dimensions. N) 6h WT cell showing measurement with satellite polyP granules.

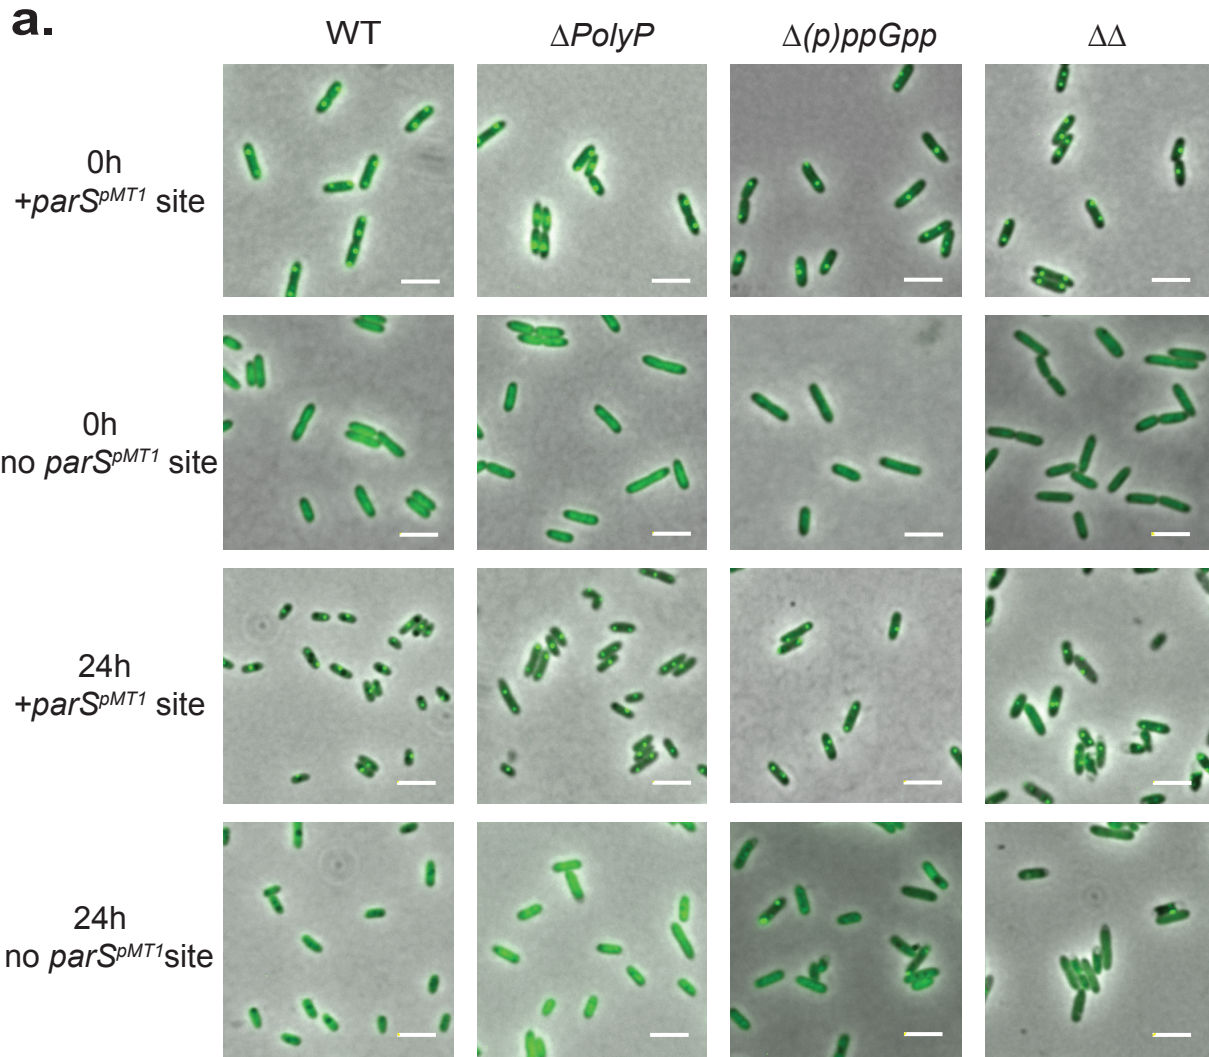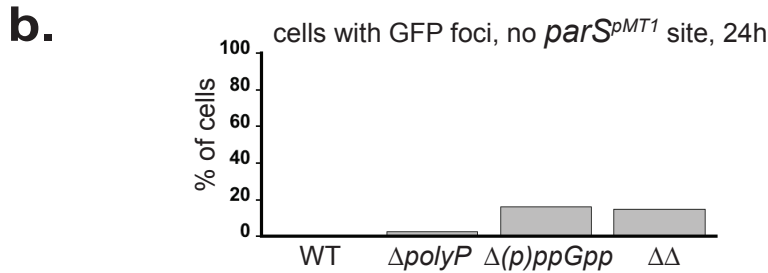

**Figure S3. Control for specificity of GFP-ParB<sup>pMT1</sup>-*parS*<sup>pMT1</sup>-interaction.** Scale bar = 2  $\mu$ m  
 A) Top Panel: All four strains carrying both GFP-ParB<sup>pMT1</sup> under control of the SSB promoter and *parS*<sup>pMT1</sup> at the *attT7* site. Exponential phase cells grown in MOPS minimal media. 2nd Panel: All four strains carrying GFP-ParB<sup>pMT1</sup> under control of the SSB promoter at the *attT7* site, without a *parS*<sup>pMT1</sup> site, exponential phase. 3rd Panel: All four strains carrying both GFP-ParB<sup>pMT1</sup> under control of the SSB promoter and *parS*<sup>pMT1</sup> at the *attT7* site. 24h nitrogen-starved cells. Bottom Panel: All four strains carrying GFP-ParB<sup>pMT1</sup> under control of the SSB promoter at the *attT7* site, without a *parS*<sup>pMT1</sup> site. 24h nitrogen-starved cells. B) Fraction of cells lacking the *parS*<sup>pMT1</sup> site with GFP foci after 24h nitrogen starvation (As in 3<sup>rd</sup> panel of A).

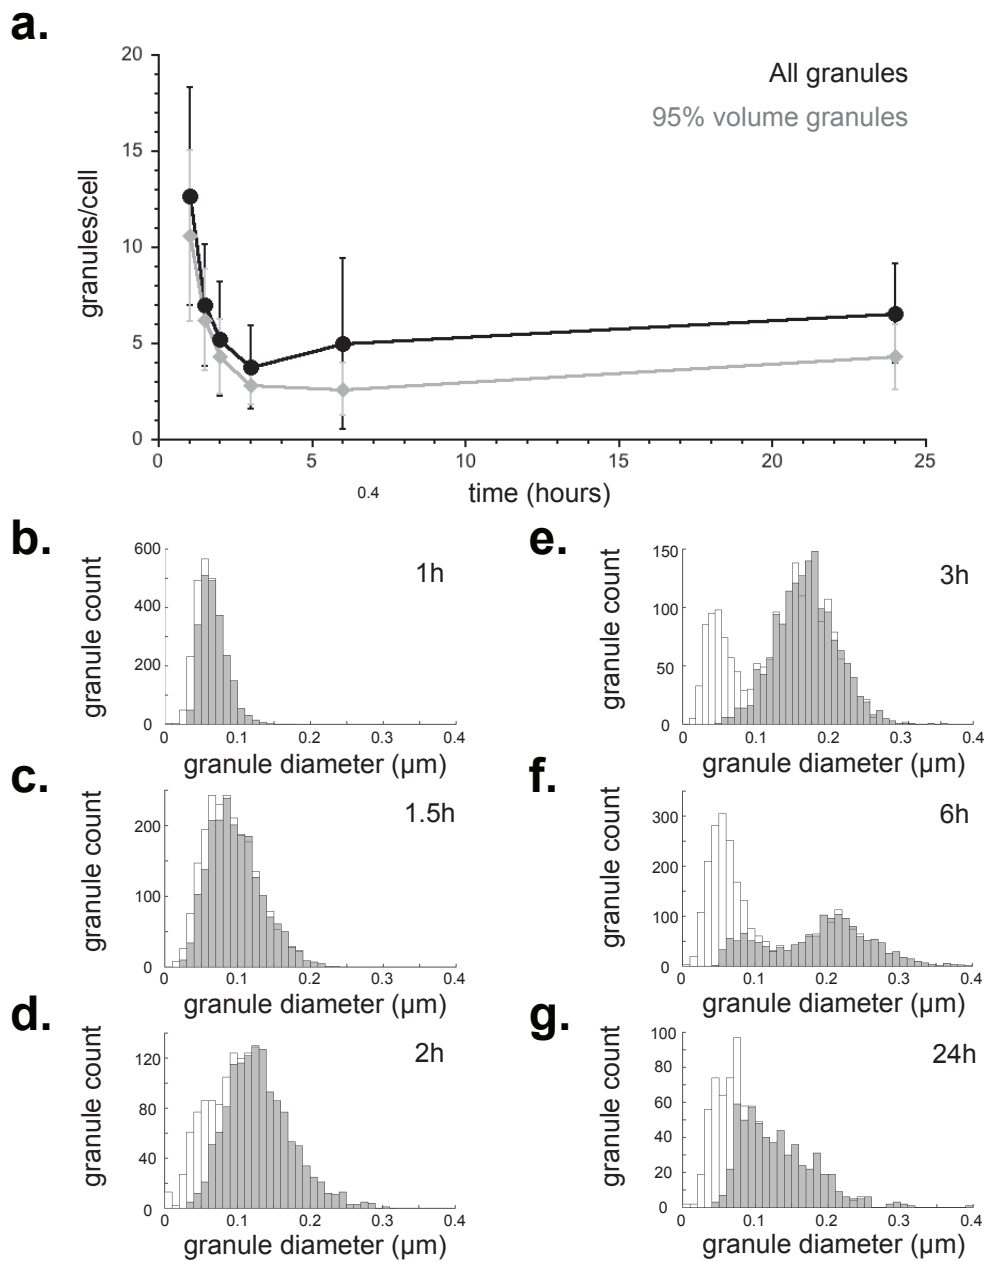

**Figure S4. Changes in granule number and size.** A) Total number of granules per cell. All granules shown in black circles, granules constituting 95% of total granular volume per cell in grey diamonds. Granule diameter for all granules (white bars) and granules constituting 95% of total granular volume (grey bars). B) 1h, mean granule diameter for all granules of  $0.062 \pm 0.02 \mu\text{m}$ . C) mean granule diameter for all granules of 1.5h,  $0.092 \pm 0.037 \mu\text{m}$ . D) 2h, mean granule diameter for all granules of  $0.115 \pm 0.052 \mu\text{m}$ . E) 3h, mean granule diameter for all granules, bimodal distribution,  $0.052 \pm 0.019 \mu\text{m}$  and  $0.188 \pm 0.050 \mu\text{m}$ . F) 6h, mean granule diameter for all granules, bimodal distribution  $0.056 \pm 0.020 \mu\text{m}$  and  $0.21 \pm 0.060 \mu\text{m}$ ; G) 24h,  $0.104 \pm 0.057 \mu\text{m}$ .



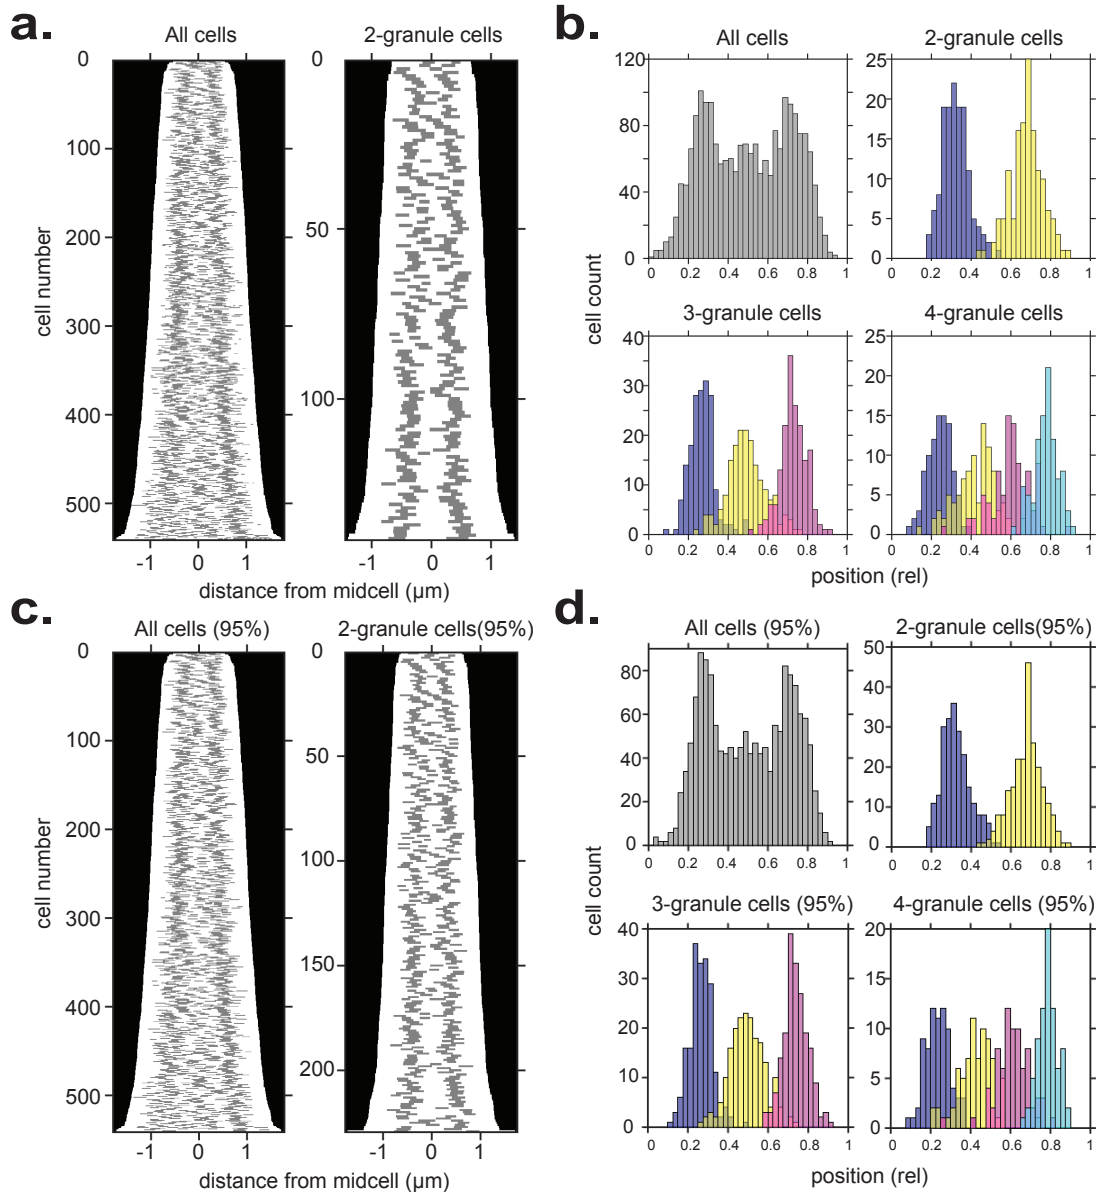

**Figure S5. Granule spacing on long axis of the cell.** A) Left: Demograph of all granules in 3h-starved cells imaged by TEM. Right: Demograph of all 2-granule cells in 3h-starved cells. B) Histogram of relative position of granules along long axis of cells imaged by TEM as in (A). Top Left: All cells, Top Right: 2-granule cells, 1<sup>st</sup> granule  $0.32 \pm 0.07$ , 2<sup>nd</sup> granule  $0.68 \pm 0.08$ , Bottom Left: 3-granule cells, 1<sup>st</sup> granule  $0.27 \pm 0.06$ , 2<sup>nd</sup> granule  $0.49 \pm 0.10$ , 3<sup>rd</sup> granule  $0.73 \pm 0.06$ . Bottom Right: 4-granule cells, 1<sup>st</sup> granule  $0.24 \pm 0.1$ , 2<sup>nd</sup> granule  $0.42 \pm 0.10$ , 3<sup>rd</sup> granule  $0.60 \pm 0.10$ , 4<sup>th</sup>  $0.78 \pm 0.06$  C) As in (A), but imaging only size-ranked granules contributing to 95% or more of total granular volume per cell. D) As in (B), but for size-ranked granules contributing to 95% or more of total granular volume per cell. Top Left: All cells. Top Right: 2-granule cells, 1<sup>st</sup> granule  $0.24 \pm 0.06$ , 2<sup>nd</sup> granule  $0.68 \pm 0.08$ , Bottom Left: 3-granule cells, 1<sup>st</sup> granule  $0.26 \pm 0.06$ , 2<sup>nd</sup> granule  $0.50 \pm 0.09$ , 3<sup>rd</sup> granule  $0.74 \pm 0.06$ , Bottom Right: 4-granule cells, 1<sup>st</sup> granule  $0.24 \pm 0.06$ , 2<sup>nd</sup> granule  $0.43 \pm 0.09$ , 3<sup>rd</sup> granule  $0.61 \pm 0.08$ , 4<sup>th</sup> granule  $0.78 \pm 0.05$ .

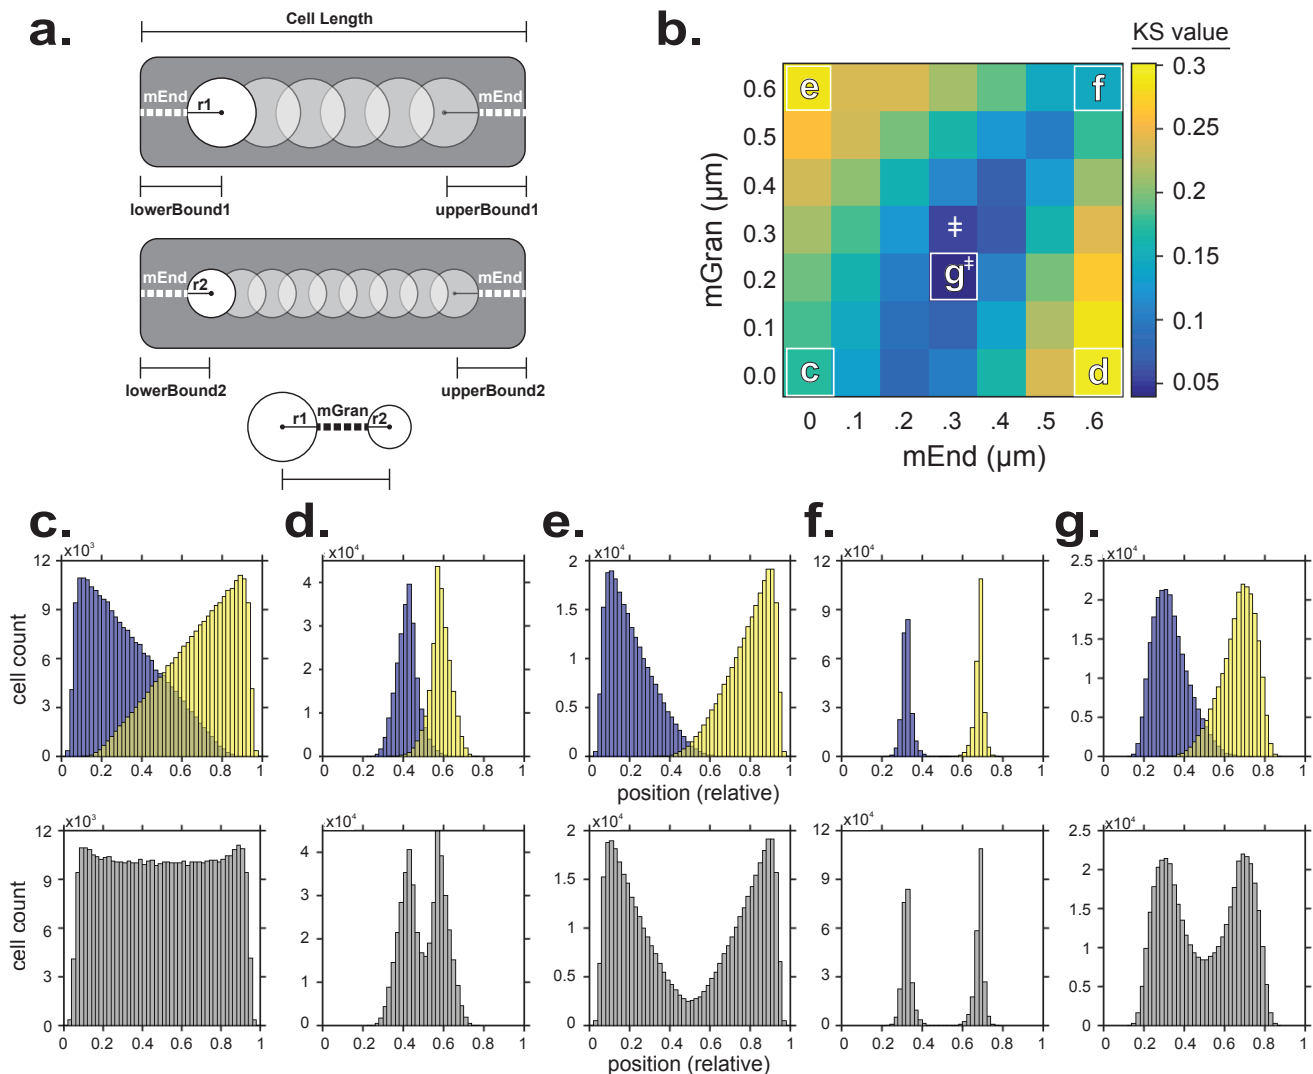

**Figure S6. Simulation of polyP granule positioning on long axis of the cell.** A) Model for the simulation.  $mEnd$  = user-defined constraint on the minimum distance (in  $\mu m$ ) from cell ends. For the first granule,  $lowerBound1$  and  $upperBound1$  defined by the sum of the radius of granule 1 ( $r_1$ ) and a user-defined minimum distance for granules from cell ends ( $mEnd$ ). The allowed region for the origin of granule 1: between  $lowerBound$  and ( $cell\ Length$  minus  $upperBound$ ). For the second granule,  $lowerBound2$  and  $upperBound2$  defined by the sum of the radius of granule 2 ( $r_2$ ) and the user-defined minimum distance for granules from cell ends. A user-defined minimum distance between granules ( $mGran$ ) constrains the origins of granules 1 and 2 to be at least  $r_1+mGran+r_2$  apart. B) Heat map of KS-test statistic from comparing the experimentally observed distribution of granules in 2-granule cells to a simulation of randomly positioning granules along the long axis of the cell, with two added constraints: First, a minimum distance between granules and cell ends ( $mEnd$ ) and second, a minimum distance between 1st and 2nd granule ( $mGran$ ). Symbol  $\ddagger$  indicates parameter space where the model is statistically indistinguishable from the data. C) Top panel: Histogram of relative granule positions (blue for granule 1, yellow for granule 2) along long axis of cells from a simulation of 229,000 cells in which the only constraint is that granules cannot overlap along long axis of the cell ( $mEnd = 0 \mu m$ ,  $mGran = 0 \mu m$ ). Bottom panel: Histogram of combined granule 1 and granule 2 relative granule relative positions, this combined distribution was used for KS-testing. D) As in (C), but  $mEnd = 0.6 \mu m$ ,  $mGran = 0 \mu m$ , E) As in (C), but  $mEnd = 0 \mu m$ ,  $mGran = 0.6 \mu m$ . F) As in (C), but  $mEnd = 0.6 \mu m$ ,  $mGran = 0.6 \mu m$ . G) As in (C), but  $mEnd = 0.3 \mu m$ ,  $mGran = 0.2 \mu m$ .

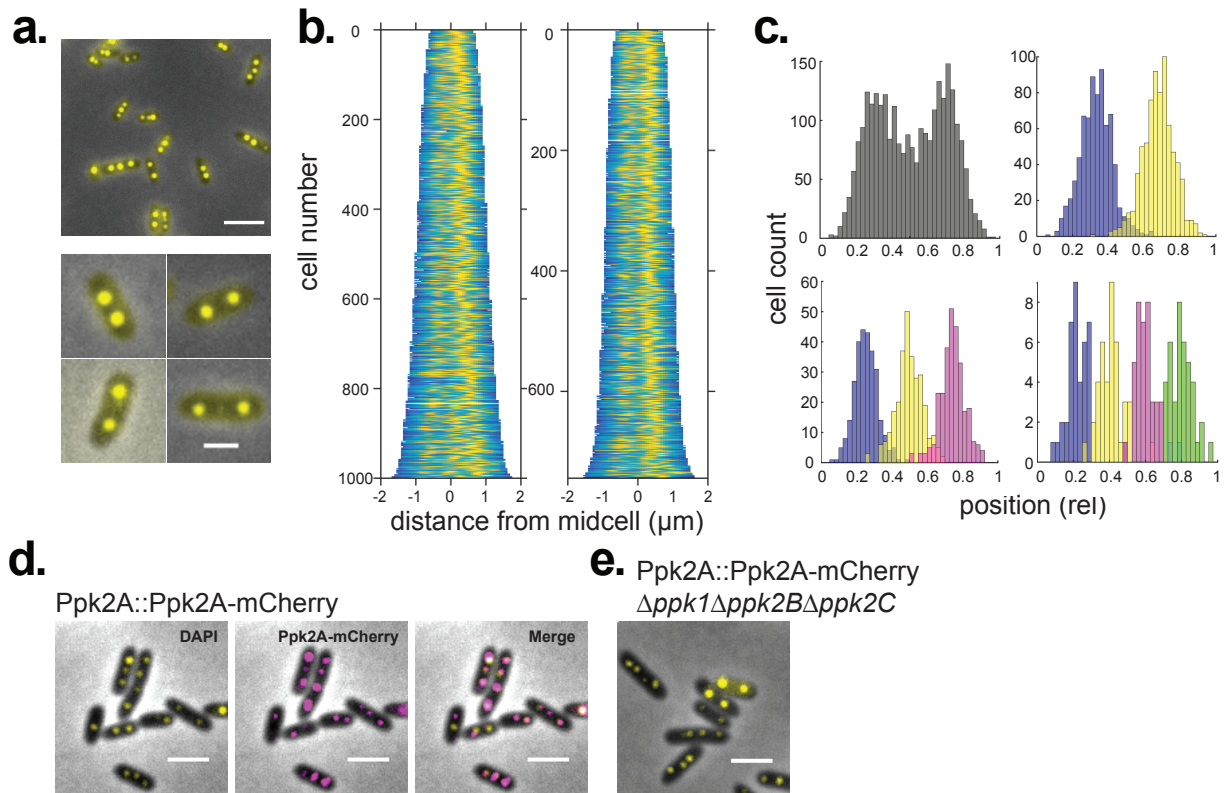

**Figure S7. Granule spatial organization imaged by DAPI fluorescence.** A) Top panel: Granules stained with DAPI in 3h-starved cells (scale bar 3  $\mu\text{m}$ ). Bottom panel: Example cells with 2 granules (scale bar 2  $\mu\text{m}$ ). B) Left panel: Demograph of DAPI fluorescence in 3h-starved cells; Right panel: Demograph of DAPI fluorescence in 3h-starved 2-granule cells, C) Histograms of relative position of granules along the long axis of cells imaged by DAPI in 3h-starved cells. Top left panel: all granules, Top right panel: 2-granule cells, 1<sup>st</sup> granule  $0.32 \pm 0.08$  (blue), 2<sup>nd</sup> granule  $0.67 \pm 0.09$  (yellow); Bottom left panel: 3-granule cells, 1<sup>st</sup> granule  $0.25 \pm 0.07$  (blue), 2<sup>nd</sup> granule  $0.50 \pm 0.08$  (yellow), 3<sup>rd</sup> granule  $0.74 \pm 0.08$  magenta; Bottom right panel: 4-granule cells, 1<sup>st</sup> granule  $0.23 \pm 0.07$  (blue), 2<sup>nd</sup> granule  $0.41 \pm 0.07$  (yellow), 3<sup>rd</sup> granule  $0.60 \pm 0.06$  (magenta), 4<sup>th</sup> granule  $0.80 \pm 0.06$  (green). D) Granules imaged with DAPI (yellow) and co-localization with Ppk2A-mCherry chimera (magenta). Scale bar 2  $\mu\text{m}$ . E) Ppk2A::Ppk2A-mCherry imaging in cells lacking the other three known polyphosphate kinases ( $\Delta ppk1 \Delta ppk2B \Delta ppk2C$ ). Scale bar 2  $\mu\text{m}$ .

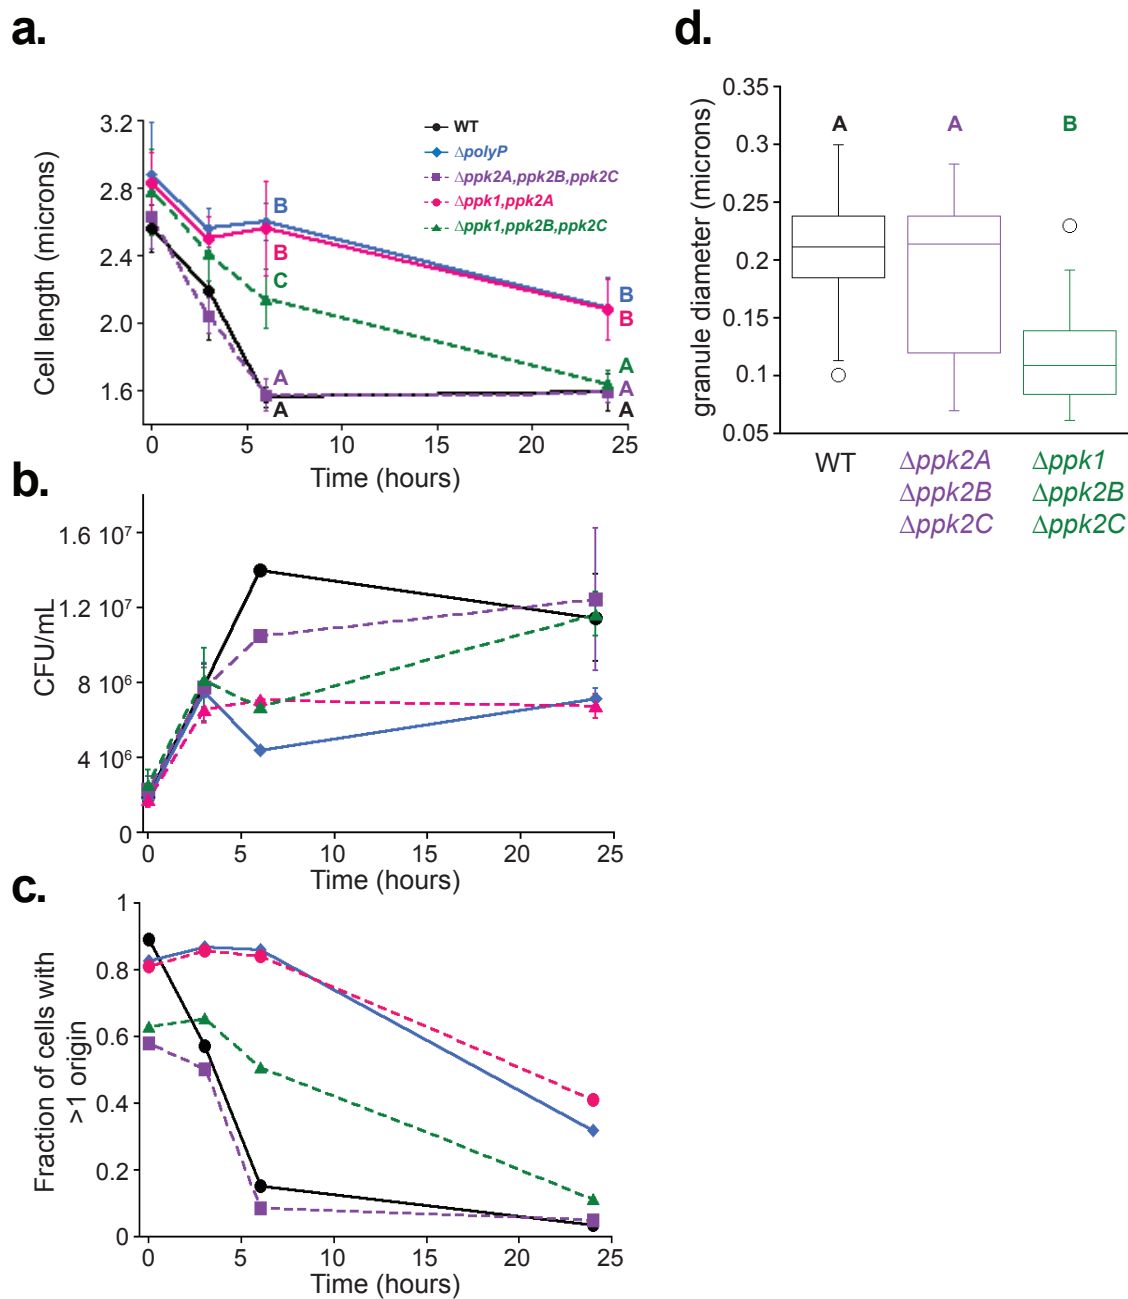

**Figure S8. Effects of individual polyphosphate kinases on cell cycle exit.** WT black circles;  $\Delta polyP$  ( $\Delta ppk1\Delta ppk2A\Delta ppk2B\Delta ppk2C$ ) blue diamonds;  $\Delta ppk2A\Delta ppk2B\Delta ppk2C$  purple squares/-dashed line;  $\Delta ppk1\Delta ppk2A$  magenta circles/dashed line;  $\Delta ppk1\Delta ppk2B\Delta ppk2C$  green triangles/-dashed line. A) Average cell length as a function of time after induction of nitrogen starvation. Mean and SD from at least 3 independent experiments, variance analyzed using a one-way ANOVA. Significant differences between strains at the same timepoint are marked with upper case letters based on a post hoc Tukey test. Strains at the same timepoint marked with different letters have significantly different means,  $P < 0.05$ . B) Cell counts (CFU) after the shift to nitrogen-limited medium (note that 6h timepoint does not have error bars because it was not done in triplicate). C) Fraction of cells with  $>1$  GFP-ParB<sup>MT1</sup> focus as a function of time after induction of nitrogen starvation. D) Granule diameter at 3h nitrogen-starved cells. Box represents two middle quartiles separated by the median. Means: WT  $0.207 \pm 0.043$   $\mu\text{m}$ ,  $\Delta ppk2A\Delta ppk2B\Delta ppk2C$   $0.185 \pm 0.069$ ,  $\Delta ppk1\Delta ppk2B\Delta ppk2C$   $0.117 \pm 0.041$ . Variance analyzed using a one-way ANOVA, significant differences between strains are marked with upper case letters based on a post hoc Tukey test. Strains marked with different letters have significantly different means,  $P < 0.05$ .

**Table S1: Strains**

| Name          | Genotype                                                                                                                                                                                                                                                                                                                           | Source     |
|---------------|------------------------------------------------------------------------------------------------------------------------------------------------------------------------------------------------------------------------------------------------------------------------------------------------------------------------------------|------------|
| DKN263        | <i>P. aeruginosa</i> UCBPP-PA14                                                                                                                                                                                                                                                                                                    |            |
| DKN303        | <i>E. coli</i> DH5 $\alpha$ (F- $\Delta$ ( <i>argF-lac</i> )169 $\Phi$ 80 <i>dlacZ58</i> ( $\Delta$ M15) <i>glnV44</i> (AS) $\lambda$ - <i>rfbC1 gyrA96</i> (NalR) <i>recA1 endA1 spoT1 thi-1 hsdR17 deoR</i> ), pMQ30                                                                                                             | (2)        |
| DKN546        | <i>E. coli</i> DH5 $\alpha$ (F- $\Delta$ ( <i>argF-lac</i> )169 $\Phi$ 80 <i>dlacZ58</i> ( $\Delta$ M15) <i>glnV44</i> (AS) $\lambda$ - <i>rfbC1 gyrA96</i> (NalR) <i>recA1 endA1 spoT1 thi-1 hsdR17 deoR</i> ), pMQ70                                                                                                             | (2)        |
| DKN548        | <i>E. coli</i> DH5 $\alpha$ (F- $\Delta$ ( <i>argF-lac</i> )169 $\Phi$ 80 <i>dlacZ58</i> ( $\Delta$ M15) <i>glnV44</i> (AS) $\lambda$ - <i>rfbC1 gyrA96</i> (NalR) <i>recA1 endA1 spoT1 thi-1 hsdR17 deoR</i> ), pMQ72                                                                                                             | (2)        |
| DKN1297       | <i>E. coli</i> DH5 $\alpha$ (F- $\Delta$ ( <i>argF-lac</i> )169 $\Phi$ 80 <i>dlacZ58</i> ( $\Delta$ M15) <i>glnV44</i> (AS) $\lambda$ - <i>rfbC1 gyrA96</i> (NalR) <i>recA1 endA1 spoT1 thi-1 hsdR17 deoR</i> ), pUC18R6K-mini-Tn7T-Gm                                                                                             | (3)        |
| DKN1298       | SM10, pTNS1                                                                                                                                                                                                                                                                                                                        | (3)        |
| DKN1299       | HB101<br>(F- $\lambda$ - $\Delta$ ( <i>gpt-proA</i> )62 <i>leuB6 glnV44</i> (AS) <i>araC14 galK2</i> (Oc) <i>lacY1</i> $\Delta$ ( <i>mcrC-mrr</i> ) <i>rpsL20</i> (StrR) <i>xylA5 mtl-1 recA13 hsdS20</i> ), pRK2013<br>pRK2013 has a <i>ColE1</i> replicon and carries the <i>RK2 tra</i> genes and Tn903 (which is <i>KanR</i> ) | (3)        |
| LR51;DKN1723  | <i>P. aeruginosa</i> UCBPP-PA14 $\Delta$ ( <i>phaC1-phaC2</i> ); deletion of PA14_66820, PA14_66830, PA14_66840 using pLREX24                                                                                                                                                                                                      | This study |
| LR60;DKN1724  | <i>P. aeruginosa</i> UCBPP-PA14 $\Delta$ <i>pplk2A</i> ; deletion of PA14_01730 in DKN263 using pLREX25                                                                                                                                                                                                                            | This study |
| LR49;DKN1725  | <i>P. aeruginosa</i> UCBPP-PA14 $\Delta$ <i>pplk2B</i> ; deletion of PA14_33240 in DKN263 using pLREX21                                                                                                                                                                                                                            | This study |
| LR50;DKN1726  | <i>P. aeruginosa</i> UCBPP-PA14 $\Delta$ <i>pplk2C</i> ; deletion of PA14_19410 in DKN263 using pLREX23                                                                                                                                                                                                                            | This study |
| LR105;DKN1727 | <i>P. aeruginosa</i> UCBPP-PA14 $\Delta$ <i>pplk1</i> ; deletion of PA14_69230 in DKN263                                                                                                                                                                                                                                           | This study |

|               |                                                                                                                                                                                     |            |
|---------------|-------------------------------------------------------------------------------------------------------------------------------------------------------------------------------------|------------|
|               | using pLREX27                                                                                                                                                                       |            |
| LR110;DKN1728 | <i>P. aeruginosa</i> UCBPP-PA14 $\Delta ppk1$ $\Delta ppk2A$ ; deletion of PA14_69230 and PA14_1730 in DKN263                                                                       | This study |
| LR135;DKN1729 | <i>P. aeruginosa</i> UCBPP-PA14 $\Delta ppk1$ $\Delta ppk2B$ $\Delta ppk2C$ ; deletion of PA14_69230, PA14_33240, and PA14_19410 in DKN263                                          | This study |
| LR79;DKN1730  | <i>P. aeruginosa</i> UCBPP-PA14 $\Delta ppk2A$ $\Delta ppk2B$ $\Delta ppk2C$ ; deletion of PA14_01730, PA14_33240, and PA14_19410 in DKN263                                         | This study |
| LR119;DKN1731 | <i>P. aeruginosa</i> UCBPP-PA14 $\Delta ppk1$ $\Delta ppk2A$ $\Delta ppk2B$ $\Delta ppk2C$ ; deletion of PA14_69230, PA14_01730, PA14_33240, and PA14_19410 in DKN263               | This study |
| LR171;DKN1732 | <i>P. aeruginosa</i> UCBPP-PA14 $\Delta relA$                                                                                                                                       | This study |
| LR178;DKN1733 | <i>P. aeruginosa</i> UCBPP-PA14 $\Delta relA$ $\Delta spoT$                                                                                                                         | This study |
| LR193;DKN1734 | <i>P. aeruginosa</i> UCBPP-PA14 $\Delta ppk1$ $\Delta ppk2A$ $\Delta ppk2B$ $\Delta ppk2C$ $\Delta relA$ $\Delta spoT$                                                              | This study |
| LR176;DKN1735 | <i>P. aeruginosa</i> UCBPP-PA14 $attTn7::$ mini-Tn7T-Gm <sup>R</sup> $P_{ssb::ssb}$ -mCherry                                                                                        | This study |
| LR177;DKN1736 | <i>P. aeruginosa</i> UCBPP-PA14 $\Delta ppk1$ $\Delta ppk2A$ $\Delta ppk2B$ $\Delta ppk2C$ $attTn7::$ mini-Tn7T-Gm <sup>R</sup> $P_{ssb::ssb}$ -mCherry                             | This study |
| LR190;DKN1737 | <i>P. aeruginosa</i> UCBPP-PA14 $\Delta relA$ $\Delta spoT$ $attTn7::$ mini-Tn7T-Gm <sup>R</sup> $P_{ssb::ssb}$ -mCherry                                                            | This study |
| LR207;DKN1738 | <i>P. aeruginosa</i> UCBPP-PA14 $\Delta ppk1$ $\Delta ppk2a$ $\Delta ppk2b$ $\Delta ppk2c$ $\Delta relA$ $\Delta spoT$ $attTn7::$ mini-Tn7T-Gm <sup>R</sup> $P_{ssb::ssb}$ -mCherry | This study |
| LR209;DKN1739 | <i>P. aeruginosa</i> UCBPP-PA14 $attTn7::$ mini-Tn7T-Gm <sup>R</sup> $P_{ssb::GFP-parB}^{pMT1}$                                                                                     | This study |
|               | <i>P. aeruginosa</i> UCBPP-PA14 $attTn7::$ mini-Tn7T-Gm <sup>R</sup> $parS^{pMT1}$ $P_{ssb::GFP-parB}^{pMT1}$                                                                       | This study |
| LR210;DKN1740 | <i>P. aeruginosa</i> UCBPP-PA14 $\Delta ppk1$ $\Delta ppk2A$ $\Delta ppk2B$ $\Delta ppk2C$ $attTn7::$ mini-Tn7T-Gm <sup>R</sup> $parS^{pMT1}$ $P_{ssb::GFP-parB}^{pMT1}$            | This study |

|               |                                                                                                                                                                                                                                                                                                         |            |
|---------------|---------------------------------------------------------------------------------------------------------------------------------------------------------------------------------------------------------------------------------------------------------------------------------------------------------|------------|
| LR213;DKN1741 | <i>P. aeruginosa</i> UCBPP-PA14 $\Delta relA$<br>$\Delta spoT$ attTn7:: mini-Tn7T-Gm <sup>R</sup><br>$P_{ssb}$ :GFP- <i>parB</i> <sup>pMT1</sup>                                                                                                                                                        | This study |
| LR214;DKN1742 | <i>P. aeruginosa</i> UCBPP-PA14 $\Delta relA$<br>$\Delta spoT$ attTn7:: mini-Tn7T-Gm <sup>R</sup><br><i>parS</i> <sup>pMT1</sup> $P_{ssb}$ : GFP- <i>parB</i> <sup>pMT</sup>                                                                                                                            | This study |
| LR116;DKN1743 | <i>P. aeruginosa</i> UCBPP-PA14 $\Delta ppk1$<br>$\Delta ppk2A$ $\Delta ppk2B$ $\Delta pp2C$ $\Delta relA$ $\Delta spoT$<br>attTn7:: mini-Tn7T-Gm <sup>R</sup> $P_{ssb}$ : GFP- <i>parB</i> <sup>pMT1</sup>                                                                                             | This study |
| LR151;DKN1744 | <i>P. aeruginosa</i> UCBPP-PA14 $\Delta ppk1$<br>$\Delta ppk2A$ $\Delta ppk2B$ $\Delta pp2C$ $\Delta relA$ $\Delta spoT$<br>attTn7:: mini-Tn7T-Gm <sup>R</sup> <i>parS</i> <sup>pMT1</sup><br>$P_{ssb}$ : GFP- <i>parB</i> <sup>pMT1</sup>                                                              | This study |
| LR216;DKN1745 | <i>P. aeruginosa</i> UCBPP-PA14<br><i>ppk2A</i> :: <i>ppk2A</i> -mCherry                                                                                                                                                                                                                                | This study |
| LR263;DKN1746 | <i>P. aeruginosa</i> UCBPP-PA14<br><i>ppk2A</i> :: <i>ppk2A</i> -mCherry $\Delta ppk1$<br>$\Delta ppk2B$ $\Delta ppk2C$                                                                                                                                                                                 | This study |
| LR258;DKN1747 | <i>P. aeruginosa</i> UCBPP-PA14<br><i>ppk2A</i> :: <i>ppk2A</i> -mCherry attTn7::<br>mini-Tn7T-Gm <sup>R</sup> <i>parS</i> <sup>pMT1</sup> $P_{ssb}$ : GFP- <i>parB</i> <sup>pMT</sup>                                                                                                                  | This study |
| LR262;DKN1748 | <i>P. aeruginosa</i> UCBPP-PA14 attTn7::<br>mini-Tn7T-Gm <sup>R</sup> $P_{bad}$ Flag- <i>ppK2A</i><br><i>parS</i> <sup>pMT1</sup> $P_{ssb}$ : <i>ssb</i> -mCherry GFP- <i>parB</i> <sup>pMT1</sup>                                                                                                      | This study |
| LR107;DKN1749 | <i>P. aeruginosa</i> UCBPP-PA14 attTn7::<br>mini-Tn7T-Gm <sup>R</sup> $P_{bad}$ Flag-<br><i>ppk2A</i> <sup>D183A R194A</sup> <i>parS</i> <sup>pMT1</sup> $P_{ssb}$ : <i>ssb</i> -<br>mCherry GFP- <i>parB</i> <sup>pMT1</sup>                                                                           | This study |
| LR42;DKN1750  | <i>P. aeruginosa</i> UCBPP-PA14 attTn7::<br>mini-Tn7T-Gm <sup>R</sup> $P_{bad}$ His-TEV-<br><i>ppk2B</i> <i>parS</i> <sup>pMT1</sup> $P_{ssb}$ : <i>ssb</i> -mCherry<br>GFP- <i>parB</i> <sup>pMT1</sup>                                                                                                | This study |
| LR48;DKN1751  | <i>E. coli</i> TOP10(F- <i>mcrA</i> $\Delta(mrr$ -<br><i>hsdRMS-mcrBC) <math>\Phi 80lacZ\Delta M15</math><br/><math>\Delta lacX74</math> <i>recA1</i> <i>araD139</i> <math>\Delta(ara</math> <i>leu)</i><br/>7697 <i>galU</i> <i>galK</i> <i>rpsL</i> (StrR) <i>endA1</i><br/><i>nupG</i>), pLREX9</i>  | This study |
| LR42;DKN1750  | <i>E. coli</i> TOP10(F- <i>mcrA</i> $\Delta(mrr$ -<br><i>hsdRMS-mcrBC) <math>\Phi 80lacZ\Delta M15</math><br/><math>\Delta lacX74</math> <i>recA1</i> <i>araD139</i> <math>\Delta(ara</math> <i>leu)</i><br/>7697 <i>galU</i> <i>galK</i> <i>rpsL</i> (StrR) <i>endA1</i><br/><i>nupG</i>), pLREX15</i> | This study |
| LR48;DKN1751  | <i>E. coli</i> TOP10(F- <i>mcrA</i> $\Delta(mrr$ -                                                                                                                                                                                                                                                      | This study |

|               |                                                                                                                                                                                                           |            |
|---------------|-----------------------------------------------------------------------------------------------------------------------------------------------------------------------------------------------------------|------------|
| LR55;DKN1752  | <i>hsdRMS-mcrBC</i> ) $\Phi 80lacZ\Delta M15$<br>$\Delta lacX74 recA1 araD139 \Delta(ara leu)$<br>7697 <i>galU galK rpsL</i> (StrR) <i>endA1 nupG</i> ), pLREX21                                          | This study |
| LR53;DKN1753  | <i>E. coli</i> TOP10(F- <i>mcrA</i> $\Delta(mrr-hsdRMS-mcrBC)$ $\Phi 80lacZ\Delta M15$<br>$\Delta lacX74 recA1 araD139 \Delta(ara leu)$<br>7697 <i>galU galK rpsL</i> (StrR) <i>endA1 nupG</i> ), pLREX23 | This study |
| LR52;DKN1754  | <i>E. coli</i> TOP10(F- <i>mcrA</i> $\Delta(mrr-hsdRMS-mcrBC)$ $\Phi 80lacZ\Delta M15$<br>$\Delta lacX74 recA1 araD139 \Delta(ara leu)$<br>7697 <i>galU galK rpsL</i> (StrR) <i>endA1 nupG</i> ), pLREX24 | This study |
| LR86;DKN1755  | <i>E. coli</i> TOP10(F- <i>mcrA</i> $\Delta(mrr-hsdRMS-mcrBC)$ $\Phi 80lacZ\Delta M15$<br>$\Delta lacX74 recA1 araD139 \Delta(ara leu)$<br>7697 <i>galU galK rpsL</i> (StrR) <i>endA1 nupG</i> ), pLREX25 | This study |
| LR169;DKN1756 | <i>E. coli</i> TOP10(F- <i>mcrA</i> $\Delta(mrr-hsdRMS-mcrBC)$ $\Phi 80lacZ\Delta M15$<br>$\Delta lacX74 recA1 araD139 \Delta(ara leu)$<br>7697 <i>galU galK rpsL</i> (StrR) <i>endA1 nupG</i> ), pLREX27 | This study |
| LR170;DKN1757 | <i>E. coli</i> TOP10(F- <i>mcrA</i> $\Delta(mrr-hsdRMS-mcrBC)$ $\Phi 80lacZ\Delta M15$<br>$\Delta lacX74 recA1 araD139 \Delta(ara leu)$<br>7697 <i>galU galK rpsL</i> (StrR) <i>endA1 nupG</i> ), pLREX35 | This study |
| LR173;DKN1758 | <i>E. coli</i> TOP10(F- <i>mcrA</i> $\Delta(mrr-hsdRMS-mcrBC)$ $\Phi 80lacZ\Delta M15$<br>$\Delta lacX74 recA1 araD139 \Delta(ara leu)$<br>7697 <i>galU galK rpsL</i> (StrR) <i>endA1 nupG</i> ), pLREX36 | This study |
| LR211;DKN1759 | <i>E. coli</i> TOP10(F- <i>mcrA</i> $\Delta(mrr-hsdRMS-mcrBC)$ $\Phi 80lacZ\Delta M15$<br>$\Delta lacX74 recA1 araD139 \Delta(ara leu)$<br>7697 <i>galU galK rpsL</i> (StrR) <i>endA1 nupG</i> ), pLREX38 | This study |
| LR227;DKN1760 | <i>E. coli</i> TOP10(F- <i>mcrA</i> $\Delta(mrr-hsdRMS-mcrBC)$ $\Phi 80lacZ\Delta M15$                                                                                                                    | This study |



|                |                                                                                                                                                        |            |
|----------------|--------------------------------------------------------------------------------------------------------------------------------------------------------|------------|
| LR228;DKN1761  | <i>ΔlacX74 recA1 araD139 Δ(ara leu) 7697 galU galK rpsL (StrR) endA1 nupG</i> , pLREX60                                                                | This study |
| LR229;DKN1762  | <i>E. coli</i> TOP10(F– <i>mcrA Δ(mrr-hsdRMS-mcrBC) Φ80lacZΔM15 ΔlacX74 recA1 araD139 Δ(ara leu) 7697 galU galK rpsL (StrR) endA1 nupG</i> ), pLREX61  | This study |
| LR245;DKN1763  | <i>E. coli</i> TOP10(F– <i>mcrA Δ(mrr-hsdRMS-mcrBC) Φ80lacZΔM15 ΔlacX74 recA1 araD139 Δ(ara leu) 7697 galU galK rpsL (StrR) endA1 nupG</i> ), pLREX63  | This study |
| LR282;DKN1764  | <i>E. coli</i> TOP10(F– <i>mcrA Δ(mrr-hsdRMS-mcrBC) Φ80lacZΔM15 ΔlacX74 recA1 araD139 Δ(ara leu) 7697 galU galK rpsL (StrR) endA1 nupG</i> ), pLREX64  | This study |
| LR283;DKN1765  | <i>E. coli</i> TOP10(F– <i>mcrA Δ(mrr-hsdRMS-mcrBC) Φ80lacZΔM15 ΔlacX74 recA1 araD139 Δ(ara leu) 7697 galU galK rpsL (StrR) endA1 nupG</i> ), pLREX65  | This study |
| LR284;DKN1766  | <i>E. coli</i> TOP10(F– <i>mcrA Δ(mrr-hsdRMS-mcrBC) Φ80lacZΔM15 ΔlacX74 recA1 araD139 Δ(ara leu) 7697 galU galK rpsL (StrR) endA1 nupG</i> ), pLREX66  | This study |
| LR285; DKN1767 | <i>E. coli</i> TOP10(F– <i>mcrA Δ(mrr-hsdRMS-mcrBC) Φ80lacZΔM15 ΔlacX74 recA1 araD139 Δ(ara leu) 7697 galU galK rpsL (StrR) endA1 nupG</i> ), pFHC3228 | (4)        |
| LR286; DKN1768 | <i>E. coli</i> TOP10(F– <i>mcrA Δ(mrr-hsdRMS-mcrBC) Φ80lacZΔM15 ΔlacX74 recA1 araD139 Δ(ara leu) 7697 galU galK rpsL (StrR) endA1 nupG</i> ), pFHC2973 | (4)        |

**Table S2: Plasmids**

| Name                  | Genotype/Purpose                                                                                                                  | Source                      |
|-----------------------|-----------------------------------------------------------------------------------------------------------------------------------|-----------------------------|
| pMQ30                 | Allelic replacement vector                                                                                                        | Gm <sup>R</sup> (2)         |
| pMQ70                 | Expression vector with <i>P<sub>ara</sub></i> and <i>araC</i>                                                                     | Amp <sup>R</sup> (2)        |
| pMQ72                 | Expression vector with <i>P<sub>ara</sub></i> and <i>araC</i>                                                                     | Gm <sup>R</sup> (2)         |
| pUC18R6K-mini-Tn7T-Gm | Mobilizable mini-Tn7 base vector with MCS                                                                                         | Gm <sup>R</sup> (3)         |
| pFHC3228              | Source of <i>parS<sup>pMTI</sup></i> DNA binding sequence                                                                         | Amp <sup>R</sup> (4)        |
| pFHC2973              | Source of GFP- <i>ParB<sup>pMTI</sup></i>                                                                                         | Amp <sup>R</sup> (4)        |
| pLREX9                | <i>ppk2A</i> (PA14_01730):: <i>ppk2A</i> -mCherry; pMQ30 derivative                                                               | Gm <sup>R</sup> This study  |
| pLREX15               | <i>P<sub>ara</sub></i> His-TEV- <i>ppk2B</i> (PA14_33240) expression vector; pMQ72 derivative                                     | Gm <sup>R</sup> This study  |
| pLREX21               | <i>ppk2B</i> (PA14_33240) deletion vector; pMQ30 derivative                                                                       | Gent This study             |
| pLREX23               | <i>ppk2C</i> (PA14_19410) deletion vector; pMQ30 derivative                                                                       | Gent This study             |
| pLREX24               | ( <i>phaC1-phaC2</i> ) (PA14_66820, PA14_66830, PA14_66840) deletion vector; pMQ30 derivative                                     | Gent This study             |
| pLREX25               | <i>ppk2A</i> (PA14_01730)deletion vector; pMQ30 derivative                                                                        | Gent This study             |
| pLREX27               | <i>ppk1</i> (PA14_69230) deletion vector; pMQ30 derivative                                                                        | Gent This study             |
| pLREX35               | <i>spoT</i> deletion vector; pMQ30 derivative                                                                                     | Gm <sup>R</sup> This study  |
| pLREX36               | <i>relA</i> deletion vector; pMQ30 derivative                                                                                     | Gm <sup>R</sup> This study  |
| pLREX38               | pUC18T-mini-Tn7T-G <sup>R</sup> P <sub>ssb</sub> <i>ssb</i> -mCherry; pUC18R6K-mini-Tn7T-Gm derivative                            | Gm <sup>R</sup> This study  |
| pLREX49               | pUC18T-mini-Tn7T-G <sup>R</sup> <i>parS<sup>pMTI</sup></i> P <sub>ssb</sub> GFP- <i>parB<sup>pMTI</sup></i> ;                     | Gm <sup>R</sup> This study  |
| pLREX60               | <i>P<sub>ara</sub></i> Flag- <i>ppk2A</i> (PA14_01730) expression vector; pMQ70 derivative                                        | Amp <sup>R</sup> This study |
| pLREX61               | <i>P<sub>ara</sub></i> Flag- <i>ppk2A<sup>D183A,R184A</sup></i> (PA14_01730) expression vector; pMQ70 derivative                  | Amp <sup>R</sup> This study |
| pLREX62               | pUC18T-mini-Tn7T-G <sup>R</sup> <i>parS<sup>pMTI</sup></i> P <sub>ssb</sub> <i>ssb</i> -mCherry GFP- <i>parB<sup>pMTI</sup></i> ; | Gm <sup>R</sup> This study  |

|         |                                                                                                                                                                                                                                              |                 |            |
|---------|----------------------------------------------------------------------------------------------------------------------------------------------------------------------------------------------------------------------------------------------|-----------------|------------|
|         | pUC18R6K-mini-Tn7T-Gm derivative                                                                                                                                                                                                             |                 |            |
| pLREX63 | pUC18T-mini-Tn7T-G <sup>R</sup> P <sub>ssb</sub> <i>ssb</i> -mCherry GFP- <i>parB</i> <sup>pMT1</sup> ; pUC18R6K-mini-Tn7T-Gm derivative                                                                                                     | Gm <sup>R</sup> | This study |
| pLREX64 | pUC18T-mini-Tn7T-G <sup>R</sup> P <sub>ara</sub> Flag- <i>ppk2A</i> (PA14_01730) ParS <sup>pMT1</sup> P <sub>ssb</sub> <i>ssb</i> -mCherry GFP- <i>parB</i> <sup>pMT1</sup> ; pUC18R6K-mini-Tn7T-Gm derivative                               | Gm <sup>R</sup> | This study |
| pLREX65 | pUC18T-mini-Tn7T-G <sup>R</sup> P <sub>ara</sub> Flag- <i>ppk2A</i> <sup>D183A,R184A</sup> (PA14_01730) <i>parS</i> <sup>pMT1</sup> P <sub>ssb</sub> <i>ssb</i> -mCherry GFP- <i>parB</i> <sup>pMT1</sup> ; pUC18R6K-mini-Tn7T-Gm derivative | Gm <sup>R</sup> | This study |
| pLREX66 | pUC18T-mini-Tn7T-G <sup>R</sup> P <sub>ara</sub> Flag- <i>ppk2B</i> (PA14_33240) <i>parS</i> <sup>pMT1</sup> P <sub>ssb</sub> <i>ssb</i> -mCherry GFP- <i>parB</i> <sup>pMT1</sup> ; pUC18R6K-mini-Tn7T-Gm derivative                        | Gm <sup>R</sup> | This study |

**Table S3: Primers**

| Name    | Purpose                                                                                   | Sequence                                                         |
|---------|-------------------------------------------------------------------------------------------|------------------------------------------------------------------|
| LRPR20  | Construction of pLREX27, <i>ppk1</i> deletion vector                                      | GTAAAACGACGGCCAGTGCCAAGCTTcctacaccgctgcggcgcaat                  |
| LRPR23  | Construction of pLREX27, <i>ppk1</i> deletion vector                                      | ATGATTACGAATTCGAGCTCGGTACCagcctgcagatgggtgcgtcag                 |
| LRPR44  | Construction of pLREX25, <i>ppk2A</i> deletion vector                                     | GTAAAACGACGGCCAGTGCCAAGCTTgctgtcggcgaggatggct                    |
| LRPR45  | Construction of pLREX21, <i>ppk2A</i> deletion vector                                     | ATGATTACGAATTCGAGCTCGGTACCatggccatcgagaacttcat                   |
| LRPR54  | Construction of pLREX21, <i>ppk2B</i> deletion vector                                     | GTAAAACGACGGCCAGTGCCAAGCTTgtcagcggctactgaccaatct                 |
| LRPR55  | Construction of pLREX21, <i>ppk2B</i> deletion vector                                     | ATGATTACGAATTCGAGCTCGGTACCtgcgttcttcaggctccagt                   |
| LRPR56  | Construction of pLREX21, <i>ppk2B</i> deletion vector                                     | agcccgctccggccgaacggccagcgtctctccactcatgccgaat                   |
| LRPR57  | Construction of pLREX23, <i>ppk2B</i> deletion vector                                     | atttcggcatgactggagagcagcgtggccgttcggccggacgccggct                |
| LRPR64  | Construction of pLREX23, <i>ppk2C</i> deletion vector                                     | GTAAAACGACGGCCAGTGCCAAGCTTcgttcgatcagggtcacctg                   |
| LRPR65  | Construction of pLREX23, <i>ppk2C</i> deletion vector                                     | ATGATTACGAATTCGAGCTCGGTACCccggccacggtgaagccacggaa<br>gaa         |
| LRPR66  | Construction of pLREX23, <i>ppk2C</i> deletion vector                                     | gacggcgccgattccggcagccggaggtctcccttaacctgagt                     |
| LRPR67  | Construction of pLREX23, <i>ppk2C</i> deletion vector                                     | actcaggttaaggagacctccggcctgccggaatcgggcgccgtc                    |
| LRPR82  | Construction of pLREX60, <i>P<sub>ara</sub></i> Flag- <i>ppk2A</i>                        | GGCTGAAAATCTTCTCTCATCCGCCAAAACAGCCAAGCTTT<br>CAGGCCGGGATATCCAGGT |
| LRPR83  | Construction of pLREX15, <i>P<sub>ara</sub></i> Flag- <i>ppk2B</i>                        | CATCACCATCACCATCACGAAAATTTATATTTTCAGGGTAT<br>GGACTCCTATGGCGATAC  |
| LRPR84  | Construction of pLREX15, <i>P<sub>ara</sub></i> Flag- <i>ppk2b</i>                        | GGCTGAAAATCTTCTCTCATCCGCCAAAACAGCCAAGCTTT<br>CAATAGACTTCCGGCACGA |
| LRPR227 | Construction of pLREX25, <i>ppk2A</i> deletion vector                                     | GAAAACGTAGAACGGAAGGAGCCCCGCGGGCGGGTTCGC<br>GCCAACGAAAACGC        |
| LRPR228 | Construction of pLREX25, <i>ppk2A</i> deletion vector                                     | GCGTTTTTCGTTGGCGCGACCGCCCGCCGCGGGGCTCCTTCC<br>GTTCTACGTTTTTC     |
| LRPR234 | Construction of pLREX24, ( <i>phaC1-phaC2</i> ) deletion vector                           | GTAAAACGACGGCCAGTGCCAAGCTTCAGCCGACCTGGCC<br>AGCGAGCATAG          |
| LRPR235 | Construction of pLREX24, ( <i>phaC1-phaC2</i> ) deletion vector                           | CGCCTCGAACAATGGAGCGTTGCCGAAGACCCGGCCCGGG<br>CGCCTGGAGC           |
| LRPR236 | Construction of pLREX24, ( <i>phaC1-phaC2</i> ) deletion vector                           | GCTCCAGGCGCCCGGGCCGGGTCTTCGGCAACGCTCCATTG<br>TTCGAGGCG           |
| LRPR237 | Construction of pLREX24, ( <i>phaC1-phaC2</i> ) deletion vector                           | ATGATTACGAATTCGAGCTCGGTACCCAGCCAAGGCTGCGG<br>CGAAGCCTGC          |
| LRPR238 | Construction of pLREX60, <i>P<sub>ara</sub></i> Flag- <i>ppk2A</i>                        | GGCTAGCGAATTCGAGCTCGGTACCAGGAGGATATACATAT<br>GATGGACTACAAGGACGAT |
| LRPR271 | Construction of pLREX27, <i>ppk1</i> deletion vector                                      | TtgaccctcctgggaagatgaGTAACCAGAACCCCGCAATACCCAGG                  |
| LRPR272 | Construction of pLREX27, <i>ppk1</i> deletion vector                                      | CCTGGGTATTGCGGGGGTTCTGGTTACtcatctcccaggggggtcaA                  |
| LRPR292 | Construction of pLREX61, <i>P<sub>ara</sub></i> Flag- <i>ppk2A</i> <sup>D183A,R184A</sup> | GAGATGGTCTTCTTCGCCGCTCCTGGTACAACCGC                              |
| LRPR293 | Construction of pLREX61, <i>P<sub>ara</sub></i> Flag- <i>ppk2A</i> <sup>D183A,R184A</sup> | GCGGTTGTACCAGGAGGCGGCGAAGAAGACCATCTC                             |

|         |                                                                                                                                           |                                                                  |
|---------|-------------------------------------------------------------------------------------------------------------------------------------------|------------------------------------------------------------------|
| LRPR349 | Construction of pLREX36, <i>relA</i> deletion vector                                                                                      | CTACGCGCACCGTGGTAAAGGGTAGGCAAGGGCGAGGCGG<br>AAACAGGCCACGGGCGCTCG |
| LRPR350 | Construction of pLREX36, <i>relA</i> deletion vector                                                                                      | CGAGCGCCCGTGGCCTGTTTCCGCCTCGCCTTGCCTACCT<br>TTACCACGGTGC GCGTAG  |
| LRPR351 | Construction of pLREX36, <i>relA</i> deletion vector                                                                                      | GTAAAACGACGGCCAGTGCCAAGCTTCCGCGCTCGGATCGC<br>CGTGCGCTGGG         |
| LRPR352 | Construction of pLREX36, <i>relA</i> deletion vector                                                                                      | GAATCAGCCGAAGATCCAACGATAGAGGTACCGAGCTCGA<br>ATTCGTAATCATG        |
| LRPR353 | Construction of pLREX35, <i>spoT</i> deletion vector                                                                                      | GGGTGAACCCTTGCCGGGCATACGCAGCTGACCCGCTTTTT<br>CCTGTGTCATC         |
| LRPR354 | Construction of pLREX35, <i>spoT</i> deletion vector                                                                                      | GATGACACAGGAAAAAGCGGGTCAGCTGCGTATGCCCGGC<br>AAGGGTTCACCC         |
| LRPR355 | Construction of pLREX35, <i>spoT</i> deletion vector                                                                                      | GTTGTAACGACGGCCAGTGCCAAGCTTCTCCGGCGCCGG<br>CAAGACCAGCCTG         |
| LRPR356 | Construction of pLREX35, <i>spoT</i> deletion vector                                                                                      | ATGATTACGAATTTCGAGCTCGGTACCGACCAGGCCATTGGC<br>CTGGAACTC          |
| LRPR389 | Construction of pLREX38, <i>attTn7:: mini-Tn7T-Gm<sup>R</sup> P<sub>ssb</sub> ssb-mCherry</i>                                             | AGCTAATTCGATCATGCATGAGCTCACTAGTTACTTGTACA<br>GCTCGTCCATGCCGCCGG  |
| LRPR390 | Construction of pLREX38, <i>attTn7:: mini-Tn7T-Gm<sup>R</sup> P<sub>ssb</sub> ssb-mCherry</i>                                             | AGGCCTTCGCGAGGTACCGGGCCCAAGCTTTGTGGGTACGC<br>GCCCCACGAATCAGG     |
| LRPR391 | Construction of pLREX38, <i>attTn7:: mini-Tn7T-Gm<sup>R</sup> P<sub>ssb</sub> ssb-mCherry</i>                                             | CTTGCTCACGCCGAGCCCCCGCGCTGCCGCCGAACGGAA<br>TGTCGTCGTCGAAGCTGTC   |
| LRPR392 | Construction of pLREX38, <i>attTn7:: mini-Tn7T-Gm<sup>R</sup> P<sub>ssb</sub> ssb-mCherry</i>                                             | CATTCCGTTTCGGCGGCAGCGGGGGGCTCGGGCGTGAGC<br>AAGGGCGAGGAGGATAAC    |
| LRPR435 | Construction of pLREX62, <i>attTn7:: mini-Tn7T-Gm<sup>R</sup> parS<sup>pMTI</sup> P<sub>ssb</sub> ssb-mCherry GFP-parB<sup>pMTI</sup></i> | CGGCATGGACGAGCTGTACAAGTAAAGGAGGATATACATA<br>TGTCTAAAGGTGAAGAAGT  |
| LRPR436 | Construction of pLREX62, <i>attTn7:: mini-Tn7T-Gm<sup>R</sup> parS<sup>pMTI</sup> P<sub>ssb</sub> ssb-mCherry GFP-parB<sup>pMTI</sup></i> | CAGTTCTTACCTTTAGACATATGTATATCCTCCTTTACTTG<br>TACAGCTCGTCCATGCCG  |
| LRPR437 | Construction of pLREX62, <i>attTn7:: mini-Tn7T-Gm<sup>R</sup> parS<sup>pMTI</sup> P<sub>ssb</sub> ssb-mCherry GFP-parB<sup>pMTI</sup></i> | GAGCGCTTTTGAAGCTAATTCGATCATGCATGAGCTCACTA<br>GTTACTCACCTGATTCTGG |
| LRPR442 | Construction of pLREX49, <i>attTn7:: mini-Tn7T-Gm<sup>R</sup> parS<sup>pMTI</sup> P<sub>ssb</sub> GFP-ParB<sup>pMTI</sup></i>             | GGCCTTCGCGAGGTACCGGGCCCAAGCTTGATCCAGGATGC<br>CGAAGAGCATCCTTTTTTG |
| LRPR443 | Construction of pLREX49, <i>attTn7:: mini-Tn7T-Gm<sup>R</sup> parS<sup>pMTI</sup> P<sub>ssb</sub> GFP-parB<sup>pMTI</sup></i>             | GATCCTGATTTCGTGGGGCGCGTACCCACAGCGCGAAATTAT<br>GAGTCACGAAGAGGTTG  |
| LRPR444 | Construction of pLREX49, <i>attTn7:: mini-Tn7T-Gm<sup>R</sup> parS<sup>pMTI</sup> P<sub>ssb</sub> GFP-parB<sup>pMTI</sup></i>             | CAACCTCTTCGTGACTCATAATTTCCGCGCTGTGGGTACGCG<br>CCCCACGAATCAGGATC  |
| LRPR561 | <i>oprI</i> qPCR F                                                                                                                        | AGCAGCCACTCCAAAGAAAC                                             |
| LRPR562 | <i>oprI</i> qPCR R                                                                                                                        | CAGAGCTTCGTCAGCCTTG                                              |
| LRPR555 | <i>recA</i> qPCR F                                                                                                                        | GCCCTGGAAATCACCGACAT                                             |
| LRPR556 | <i>recA</i> qPCR R                                                                                                                        | TTCGATCTCGGCCTTGGGTA                                             |
| LRPR553 | <i>lexA</i> qPCR F                                                                                                                        | CCAGGAACTCGGCTTCAAGT                                             |
| LRPR554 | <i>lexA</i> qPCR R                                                                                                                        | TGTTCTGTTCGGCGAGGATC                                             |
| LRPR611 | Construction of pLREX64,                                                                                                                  | CAGGACGCCCGCCATAAACTGCCAGGCATGATCCAGGATG                         |

|         |                                                                                                                                                                                                             |                                                                   |
|---------|-------------------------------------------------------------------------------------------------------------------------------------------------------------------------------------------------------------|-------------------------------------------------------------------|
|         | <i>attTn7</i> :: mini-Tn7T-Gm <sup>R</sup> <i>P</i> <sub>ara</sub><br>Flag- <i>ppk2A</i> <i>P</i> <sub>ssb</sub> <i>ssb</i> -mCherry<br>GFP- <i>parB</i> <sup><i>pMT1</i></sup>                             | CCGAAGAGCATCCTTTTTTG                                              |
| LRPR612 | Construction of pLREX64,<br><i>attTn7</i> :: mini-Tn7T-Gm <sup>R</sup> <i>P</i> <sub>ara</sub><br>Flag- <i>ppk2A</i> <i>P</i> <sub>ssb</sub> <i>ssb</i> -mCherry<br>GFP- <i>parB</i> <sup><i>pMT1</i></sup> | CAAAAAAGGATGCTCTTCGGCATCCTGGATCATGCCTGGCA<br>GTTTATGGCGGGCGTCCTG  |
| LRPR621 | Construction of pLREX64,<br><i>attTn7</i> :: mini-Tn7T-Gm <sup>R</sup> <i>P</i> <sub>ara</sub><br>Flag- <i>ppk2A</i> <i>P</i> <sub>ssb</sub> <i>ssb</i> -mCherry<br>GFP- <i>parB</i> <sup><i>pMT1</i></sup> | AGGCCTTCGCGAGGTACCGGGCCCAAGCTTTTATGACAACT<br>TGACGGCTACATCATTCAC  |
| LRPR637 | Construction of pLREX49,<br><i>attTn7</i> :: mini-Tn7T-Gm <sup>R</sup><br><i>parS</i> <sup><i>pMT1</i></sup> <i>P</i> <sub>ssb</sub> GFP- <i>parB</i> <sup><i>pMT1</i></sup>                                | GGATGCTGAACCTTAGGAGAACGTCAGGAGGATATACATA<br>TGTCTAAAGGTGAAGAACTG  |
| LRPR638 | Construction of pLREX49,<br><i>attTn7</i> :: mini-Tn7T-Gm <sup>R</sup><br><i>parS</i> <sup><i>pMT1</i></sup> <i>P</i> <sub>ssb</sub> GFP- <i>parB</i> <sup><i>pMT1</i></sup>                                | CAGTTCTTCACCTTTAGACATATGTATATCCTCCTGACGTTC<br>TCCTAAGGTTTCAGCATCC |

```

function [twopeas,twopeasDemograph] =
peas2pod_simulation(cells,muLength,sigmaLength,muDiameter,sigmaDiameter
,mEnd,mGran)
%cells = number of cells to simulate
%muLength = mean cell Length
%sigmaLength = standard deviation of distribution of cell lengths
%muDiameter = mean diameter of granules
%sigmaDiameter = standard deviation of distribution granule diameters
% mEnd = minimum distance of edge of granule from cell end
% mGran = minimum distance from edge of granule1 to edge of granule2

%this function generates a population of a specified number of cells with
%a normal distribution of cell lengths specified by input mean and standard
%deviation vaules generates two population of granules, each with a normal
%distribution of granule diameters using mu and sigma from EM data
%for each cell, positions granule 1 randomly, excluding from the ends
%by input mEnd + radius of granule 1
%do the same for granule 2, then check that the position of granule 2
%satisfies the following condition: it must be at least
%radius granule 1+mEnd+radius granule2 away from G1
%if it doesn't satisfy this condition, roll the dice again until it does,
%then go on to the next cell

%twopeas(i,1) = cell number
%twopeas(i,2) = cell length
%twopeas(i,3) = diameter granule 1
%twopeas(i,4) = diameter granule 2
%twopeas(i,5) = P1, position of center of granule 1
%twopeas(i,6) = P2, position of center of granule 2
%twopeas(i,7) = position of center of granule nearest to near end of cell
%twopeas(i,8) = position of center of granule furthest from near end of
%cell
%twopeas(i,9) = normalized position of center of near granule
%twopeas(i,10) = normalized position of center of far granule

twopeas = zeros(cells,12);

%generate a cell with two granules specified by distribution of lengths
%and granule diameter specified by input mu and sigma
%but pre-screen to make sure that the granules can fit into the cell length
%given the constraints of minimum distance from ends and between granules
%if it doesn't, then re-generate new granule diameters and length
%this method will start to skew towards longer cells and smaller granules
%as the constraints of minimum distance from cell ends and between granules
%increases

```

```

for i=1:cells m = i;

    while m == i;
        lengths = normrnd(muLength,sigmaLength); granule1 =
        normrnd(muDiameter,sigmaDiameter); granule2 =
        normrnd(muDiameter,sigmaDiameter);

            if (granule1+granule2+mEnd+mGran)<lengths m =
            m+1;
            else clear lengths granule1 granule2 end

    end

    twopeas(i,1) = i; twopeas(i,2) =
    lengths; twopeas(i,3) = granule1;
    twopeas(i,4) = granule2;
%r1, r2 = radii of granules 1 and 2 r1 =
    granule1/2;
    r2 = granule2/2;
%specify a region1 in which center of granule 1 can reside, by defining
%the lower and upper bounds using specified minimum distance from cell ends
%the radius of the granule, and cell length lowerBound1
    = mEnd+r1;
    upperBound1 = lengths-(mEnd+r1); region1 =
    upperBound1 -lowerBound1;
%randomly position center position of granule 1 (P1) in the specified allowed
%region1
    initialP1 = rand * region1;
%repeat the process of defining the region1 and randomly positioning granule 2
%using radius of granule 2 lowerBound2 =
    mEnd+r2; upperBound2 = lengths-(mEnd+r2);
    region2 = upperBound2 -lowerBound2; initialP2 =
    rand * region2;

%now determine if positions P1 and P2 satisfy the criteria that they are
%at least the minimum distance specified by the user (mGran) apart
%if they are not, then randomly re-position one of the granules (which one
%determined by a coin toss), and re-test if conditions satisfied j = i;

    while j == i;

        if initialP2 > initialP1...
            && (initialP2-r2)-(initialP1+r1) > mGran P1 =
            lowerBound1+initialP1;
            P2 = lowerBound2+initialP2; twopeas(i,5) = P1;

```



```

        twopeas(i,6) = P2; j = j+1;
elseif initialP1 > initialP2...
    && (initialP1-r1)-(initialP2+r2) > mGran P1 =
    lowerBound1+initialP1;
    P2 = lowerBound2+initialP2; twopeas(i,5)
    = P1; twopeas(i,6) = P2;
    j = j+1; else
    flipcoin = randi([0,1]); if
        flipcoin == 0 ...
            initialP1 = rand * region1; elseif
        flipcoin == 1 ...
            initialP2 = rand * region2;
    end
end

end

end

end
%sort the granules such that granule 1 is always closest to the near end of
%the cell
for k = 1:cells
    if twopeas(k,5) > twopeas(k,6) twopeas(k,7) =
        twopeas(k,6); twopeas(k,8) = twopeas(k,5);
        twopeas(k,9) = twopeas(k,4); twopeas(k,10) =
        twopeas(k,3);
    else
        twopeas(k,7) = twopeas(k,5); twopeas(k,8) =
        twopeas(k,6); twopeas(k,9) = twopeas(k,3);
        twopeas(k,10) = twopeas(k,4);
    end
    k = k+1;
end

% normalize to generate relative positions as well for l =
1:cells
    twopeas(l,11) = (twopeas(l,7)/twopeas(l,2));
    twopeas(l,12) = (twopeas(l,8)/twopeas(l,2));
end

% convert data into format for running demograph program (TEM version)

twopeasDemograph = zeros((2*cells),5);
j = 1;
for i=1:cells
    twopeasDemograph(j,1) = i; twopeasDemograph(j,2) = 2;
    twopeasDemograph(j,3) = twopeas(i,2);
    twopeasDemograph(j,4) = twopeas(i,7);
    twopeasDemograph(j,5) = twopeas(i,9);
    twopeasDemograph((j+1),1) = 0;
    twopeasDemograph((j+1),1) = 0;
end

```

```
twopeasDemograph((j+1),3) = 0;
twopeasDemograph((j+1),4) = twopeas(i,8);
twopeasDemograph((j+1),5) = twopeas(i,10); i =
i+1;
j = j+2;
end

figure
h = histogram(twopeas(:,11), 'FaceAlpha',0.5, 'FaceColor',[0 0 1]);

hold on
h = histogram(twopeas(:,12), 'FaceAlpha',0.5, 'FaceColor',[1 1 0]); end
```

## SI REFERENCES

1. Gibson DG, et al. (2009) Enzymatic assembly of DNA molecules up to several hundred kilobases. *Nat Meth* 6(5):343–345.
2. Shanks RMQ, Caiazza NC, Hinsa SM, Toutain CM, O'Toole GA (2006) Saccharomyces cerevisiae-Based Molecular Tool Kit for Manipulation of Genes from Gram-Negative Bacteria. *Applied and Environmental Microbiology* 72(7):5027–5036.
3. Choi K-H, Schweizer HP (2006) mini-Tn7 insertion in bacteria with single attTn7 sites: example Pseudomonas aeruginosa. *Nature Protocols* 1(1):153–161.
4. Nielsen HJ, Ottesen JR, Youngren B, Austin SJ, Hansen FG (2006) The Escherichia colichromosome is organized with the left and right chromosome arms in separate cell halves. *Molecular Microbiology* 62(2):331–338.
